30 **Abstract**

31 European hazelnut (*Corylus avellana* L.) is a tree crop of economic importance worldwide,  
32 but especially to northern Turkey, where the majority of production takes place. Hazelnut  
33 production is currently challenged by environmental stresses such as a recent outbreak of  
34 severe powdery mildew disease; furthermore, allergy to hazelnuts is an increasing health  
35 concern in some regions.

36 In order to provide a foundation for utilizing the available hazelnut genetic resources for crop  
37 improvement, we produced the first fully assembled genome sequence and annotation for a  
38 hazelnut species, from *Corylus avellana* cv. 'Tombul', one of the most important Turkish  
39 varieties. A hybrid sequencing strategy combining short reads, long reads and proximity  
40 ligation methods enabled us to resolve heterozygous regions and produce a high-quality 370  
41 Mb assembly that agrees closely with cytogenetic studies and genetic maps of the 11 *C.*  
42 *avellana* chromosomes, and covers 97.8% of the estimated genome size. The genome  
43 includes 28,409 high-confidence protein-coding genes, over 20,000 of which were  
44 functionally annotated based on homology to known plant proteins. We focused particularly  
45 on gene families encoding hazelnut allergens, and the MLO proteins that are an important  
46 susceptibility factor for powdery mildew. The complete assembly enabled us to differentiate  
47 between members of these families and identify novel homologs that may be important in  
48 mildew disease and hazelnut allergy. These findings provide examples of how the genome  
49 can be used to guide research and develop effective strategies for crop improvement in *C.*  
50 *avellana*.

## 51 **Introduction**

52 The genus *Corylus* describes the Hazels, deciduous trees and large shrubs that are  
53 widespread throughout the Northern Hemisphere and grown for their edible nuts, wood and  
54 ornamental purposes. The most economically significant species is the European Hazel  
55 (*Corylus avellana* L.), the nuts of which are known as hazelnuts, filberts or cobnuts and  
56 consumed worldwide both directly and as an ingredient in many food and confectionary  
57 products. Hazelnuts prefer a mild, damp climate; production is historically concentrated in  
58 the Black Sea region of Turkey, which provided ~65% of the world's supply in 2017 (FAO  
59 2017). Other major producers include Italy, Azerbaijan, and the USA, and in recent years  
60 several other countries have begun actively developing their hazelnut industry, such as  
61 China, Georgia, Iran and Chile.

62 In spite of its widespread use, genetic improvement of *C. avellana* as a crop has been  
63 largely limited to the American Pacific Northwest, where the devastating fungal disease,  
64 Eastern Filbert Blight, prompted a successful effort to identify and breed for genetic sources  
65 of disease resistance (Molnar and Capik 2012; Sathuvalli et al. 2017). In Turkey and  
66 elsewhere, hazelnut production is severely affected by abiotic stresses such as frost or  
67 drought, and by emerging phytopathogens such as *Erysiphe corylacearum* (Ustaoğlu 2012;  
68 Sezer et al. 2017). Over the last 3-5 years, this powdery mildew fungus has become  
69 ubiquitous in orchards in Turkey and Georgia, and controlling the disease requires repeated  
70 and costly fungicide spraying. Therefore, sources of genetic resistance to powdery mildew  
71 are urgently required. In other crop species including wheat, barley, tomato, pea &  
72 grapevine, knockdown/knockout of susceptibility genes belonging to the *Mildew Locus O*  
73 (MLO) family has been shown to confer resistance to powdery mildew fungi (Acevedo-Garcia  
74 et al. 2014). Identification of paralogous genes in *C. avellana* could suggest a target for  
75 developing resistant cultivars.

76 Moreover, in recent years nut allergy has become a well known health problem for a  
77 minority of consumers, leading to great interest in the identification of hazelnut allergens and

78 their genes (Costa et al. 2015). To date 11 different allergens, denoted “Cor a” proteins,  
79 have been identified and cloned from *C. avellana*. These proteins have diverse structure and  
80 functions and some, such as Cor a 1, are found in multiple isoforms with varying levels of  
81 allergenicity (Lüttkopf et al. 2002). Characterization of the genomic loci from which these  
82 proteins originate would be an important step to understanding how they are produced *in*  
83 *vivo*, and a foundation for developing novel and sensitive DNA-based detection methods for  
84 these allergens.

85 As with many tree species, *C. avellana* has a long generation time (up to 8 years to  
86 reach full productivity) and also displays sporophytic self-incompatibility, with genetically  
87 similar individuals unable to pollinate each other (Marinoni et al. 2009). These factors make  
88 selecting for many important traits by classical breeding approaches extremely difficult.  
89 Therefore, genomic data, which allows the identification many genetic loci simultaneously,  
90 has huge potential to support and accelerate research and breeding for *C. avellana*.

91 Accordingly, a draft genome assembly and transcriptome of the American cultivar  
92 “Jefferson”, along with re-sequencing data from 7 further cultivars, have been produced and  
93 made publicly available (Rowley et al. 2012, 2018). Transcriptome sequences have also  
94 been produced for two wild hazelnut species, *C. heterophylla* Fisch. and *C. mandshurica* (Ma  
95 et al. 2013; Chen et al. 2014). In cultivated *C. avellana*, a genetic linkage map has also been  
96 developed (Mehlenbacher et al. 2006), which has been improved by addition of SSR markers  
97 developed from both enrichment libraries and the available genome and transcriptome data  
98 (Gürçan et al. 2010; Gürçan and Mehlenbacher 2010; Colburn et al. 2017; Bhattarai and  
99 Mehlenbacher 2017). Recently, Genotyping-by-Sequencing has been used to generate  
100 thousands of SNP markers for a cross between two European cultivars (Tonda Gentile della  
101 Langhe x Merveille di Bollwiller), enabling the first genetic mapping of a quantitative trait -  
102 time of leaf budburst - in *C. avellana* (Marinoni et al. 2018). Also using a partial genome  
103 sequencing approach, novel SSR markers have been developed and used to characterize  
104 genetic diversity between Turkish and European hazelnut varieties (Öztürk et al. 2018).

105           While the studies mentioned above provide essential resources for identification of  
106 genes and molecular markers in hazelnut, there is still a need for a reference quality genome  
107 sequence of *C. avellana*, in order to identify structural relationships between genes and  
108 facilitate rapid mapping of candidate genes from molecular markers for traits of interest. In  
109 this study, using the Turkish cultivar ‘Tombul’, we apply a hybrid next-generation sequencing  
110 strategy combining short-read, long-read and physical proximity sequencing to generate a *de*  
111 *novo* chromosome-scale genome assembly consisting of 11 pseudomolecules with a total  
112 length of 370 Mb. These pseudomolecules are compared to and found to be highly  
113 consistent with previous cytogenetic data and genetic maps of the *C. avellana* genome,  
114 indicating that they represent a near-complete genome sequence. We also produce a full  
115 annotation of the genome sequence, with a detailed analysis of genes and other functional  
116 elements predicted to be involved in disease resistance and the production of hazelnut  
117 allergens.

118

## 119 **Results**

### 120 **A hybrid sequencing approach facilitates complete assembly of the hazelnut genome**

121 For an initial survey of the ‘Tombul’ hazelnut genome, we obtained high-coverage Illumina  
122 150 bp paired-end reads for their low error rate and cost-effectiveness. As previously  
123 reported (Rowley et al. 2018), this allowed us to produce a *de novo* draft genome assembly;  
124 however, this assembly was highly fragmented and 25-30% larger than previous estimates of  
125 the *C. avellana* genome size (378 Mb, calculated from flow cytometry data). This could be  
126 explained by the heterozygous regions of the genome being assembled twice into separate  
127 contigs; accordingly, Benchmarking Universal Single-Copy Orthologs analysis (BUSCO v3)  
128 (Waterhouse et al. 2018) found that 25% of highly conserved single-copy genes from land  
129 plants (360/1440) were duplicated.

130 Therefore, we improved the genome assembly by incorporating low-coverage, long single-  
131 molecule reads (Oxford NanoPore), and information about physically adjacent sequences  
132 produced using proximity ligation sequencing (Dovetail Genomics). These two approaches

133 were combined with the Illumina data separately and together, in order to assess their  
 134 relative contributions to the final assembly (Table 1). A hybrid assembly of the Illumina and  
 135 NanoPore data (Illumina + NP) gave 12,557 scaffolds with a total length of 383.1 Mb,  
 136 comparable to the expected genome size. Although the NanoPore reads were at relatively  
 137 low genome coverage (9.3x) and have a high base error rate, they enabled the assembly of  
 138 scaffolds ~10-fold larger than Illumina-only across the size distribution (Supplementary Data).  
 139 The Illumina + NP hybrid assembly also eliminated duplicated sequences and the large  
 140 majority of gaps in assembled scaffolds, compared to the Illumina-only assembly. However,  
 141 this assembly was still too fragmented to allow large-scale structural comparisons, for  
 142 example with hazelnut genetic maps and other genomes from other species. In both  
 143 genome assemblies, the observed GC content was 36%.

144

145

146 **Table 1. Genome sequencing and assembly statistics**

| Sequencing technology      | No. of Reads    | Library design                 | Total read length (Gb) | Sequence coverage <sup>1*</sup> |
|----------------------------|-----------------|--------------------------------|------------------------|---------------------------------|
| <b>Illumina PE</b>         | 2 x 136M        | Paired end, 700-800 bp insert  | 41.1                   | 108 x                           |
| <b>NanoPore</b>            | 1,351,274       | Single molecule, 1-10 kb reads | 3.53                   | 9.3 x                           |
|                            |                 |                                | Insert size range      | Physical coverage <sup>2*</sup> |
| <b>Dovetail Chicago</b>    | 2 x 221M        | Proximity ligated              | 1-100 kb               | 225 x                           |
| <b>Dovetail HiC</b>        | 2 x 242M        | Proximity ligated              | 10 kb – 10 Mb          | 3,447 x                         |
| <b>Assembly Statistics</b> |                 |                                |                        |                                 |
|                            | Illumina only   | Illumina + Dovetail            | Illumina + NP          | Illumina + NP + Dovetail        |
| No. of scaffolds (>1kb)    | 89,427          | 32,741                         | 12,557                 | 2,206                           |
| Scaffold N50 / L50         | 20927 / 7.32 kb | 12 / 13.33 Mb                  | 1299 / 78.8 kb         | 5 / 36.65 Mb                    |
| Scaffold N90 / L90         | 149112 / 204 bp | 89585 / 3.4 kb                 | 5857 / 13.7 kb         | 10 / 22.72 Mb                   |
| Total scaffold size (Mb)   | 513.8           | 520.1                          | 383.1                  | 384.2                           |
| % gap bases (N)            | 6.01%           | 6.45%                          | 0.18%                  | 0.47%                           |
| Largest scaffold           | 0.152 Mb        | 45.9 Mb                        | 0.732 Mb               | 50.95 Mb                        |

147 <sup>1</sup>Average no. of times a genome nucleotide is included in a sequence read

148 <sup>2</sup>Average no. of times a genome position is included in the region between 2 linked reads

149 \* Calculated for an estimated genome size of 378 Mbp.

150

151 In order to improve the contiguity of the assembly, we carried out proximity ligation  
152 sequencing using Dovetail Genomics' proprietary methods. These generate pairs of linked  
153 reads that originate from within the same large DNA fragment (Chicago library) or from  
154 physically adjacent nucleosomes in native chromatin (HiC library). The sequences of the  
155 linked reads are not assembled directly, but mapped to the scaffolds from a pre-existing  
156 genome assembly. The 'HiRise' bioinformatic pipeline then uses these links to determine the  
157 order and orientation of scaffolds along each pseudomolecule. Adjacent, non-overlapping  
158 scaffolds are joined with an arbitrary gap sequence of (N)<sub>100</sub>. As shown in Table 1,  
159 incorporation of the Dovetail data enabled pseudomolecules longer than >10 Mb to be  
160 assembled both from Illumina-only and Illumina + NP assemblies. However, the large  
161 number of small scaffolds in the Illumina + Dovetail assembly remained unassembled, and  
162 the duplicate scaffolds were not resolved. In contrast, the Illumina + NP + Dovetail assembly  
163 consisted of 11 chromosome-sized pseudomolecules ranging from 22.42 – 50.95 Mb in  
164 length (Table 2), in total accounting for 97.8% of the predicted genome size; the remaining  
165 unplaced scaffolds were in the size range 1-100 kb. The chromosome-sized  
166 pseudomolecules (hereafter 'chromosomes' for brevity) were labelled pchr01 – pchr11 in  
167 descending order of size. The completeness of the assembly was confirmed by BUSCO  
168 analysis; orthologs of 97% of 1440 highly conserved land plant genes were found in the  
169 chromosomes (90% complete single copies, 6% complete and duplicated, 1% fragmented).  
170 We assessed the large-scale accuracy of the hybrid assembly by comparison with previously  
171 published cytogenetic analysis of *C. avellana* chromosomes (Falistocco and Marconi 2013).  
172 Falistocco and Marconi confirmed the karyotype of diploid *C. avellana* as 2n=22, and noted  
173 that there were 3 distinct size groups of 2 large, 5 medium and 4 small chromosomes.  
174 Similarly our hybrid assembly contains 2 chromosomes of ~50 Mb, 5 ranging from 30-40 Mb,  
175 and 4 in the range 22-25 Mb. The aforementioned study also used *in situ* hybridization to  
176 locate the 45S & 5S rDNA repeats on one chromosome from the large and small groups  
177 respectively; using BLAST, we located a 45S rDNA on pchr02, and the 5S rDNA on pchr11.  
178

179 **Table 2. Chromosome pseudomolecule statistics**

| Pseudo-molecule ID | Size (Mbp) | Size group | No. of gaps ('N' percentage) | OSU linkage group (Size in cM) | Matched SSRs (no. / no. colinear) |
|--------------------|------------|------------|------------------------------|--------------------------------|-----------------------------------|
| pchr01             | 50.95      | L          | 1337 (0.48%)                 | 1 (193)                        | 16 / 16                           |
| pchr02             | 50.86      | L          | 1565 (0.54%)                 | 2 (185)                        | 10 / 10                           |
| pchr03             | 39.77      | M          | 1010 (0.43%)                 | 4 (153)                        | 14 / 12                           |
| pchr04             | 36.85      | M          | 914 (0.47%)                  | 9 (184)                        | 14 / 13                           |
| pchr05             | 36.65      | M          | 1031 (0.46%)                 | 5 (123)                        | 11 / 11                           |
| pchr06             | 30.27      | M          | 816 (0.47%)                  | 7 (123)                        | 9 / 8                             |
| pchr07             | 30.24      | M          | 609 (0.49%)                  | 11 (118)                       | 6 / 6                             |
| pchr08             | 25.77      | S          | 665 (0.46%)                  | 3 (105)                        | 10 / 10                           |
| pchr09             | 23.27      | S          | 465 (0.38%)                  | 10 (101)                       | 8 / 8                             |
| pchr10             | 22.72      | S          | 557 (0.55%)                  | 6 (88)                         | 2 / 2                             |
| pchr11             | 22.42      | S          | 630 (0.49%)                  | 8 (103)                        | 13 / 12                           |
| <i>Total</i>       | 369.78     |            | 9599 (0.48%)                 |                                | 113 / 108                         |

180

181 Furthermore, known *C.avellana* SSR sequences were mapped on to the pseudomolecules  
182 and compared with the genetic map of the cross OSU 252.146 x OSU 414.062 (Colburn et  
183 al. 2017) (Supplementary Figure 1). Each chromosome only contained SSRs from a single  
184 linkage group, meaning that they could be unambiguously identified, and 108/113 (95.6%) of  
185 the shared SSRs were co-linear in the 2 datasets, suggesting that there are no large-scale  
186 structural differences between the 'Tombul' chromosomes and the varieties from which the  
187 genetic map was constructed.

188 Taken together, these data indicate that the chromosome sequences presented here are  
189 consistent with what is known about the physical structure of the hazelnut genome, while the  
190 few differences may be the result of local translocations specific to the variety sequenced  
191 here. Therefore, we propose that these data can be used as a reference genome for  
192 ongoing studies, especially for Turkish hazelnut varieties.

193

#### 194 **Functional annotation of the hazelnut genome**

195 The chromosome sequences were annotated as described in detail below to identify  
196 repetitive sequences and functional elements such as rRNA, tRNA, miRNA and protein-  
197 coding genes (Figure 1). As is typical for eukaryotic genomes, transcribed genes were more



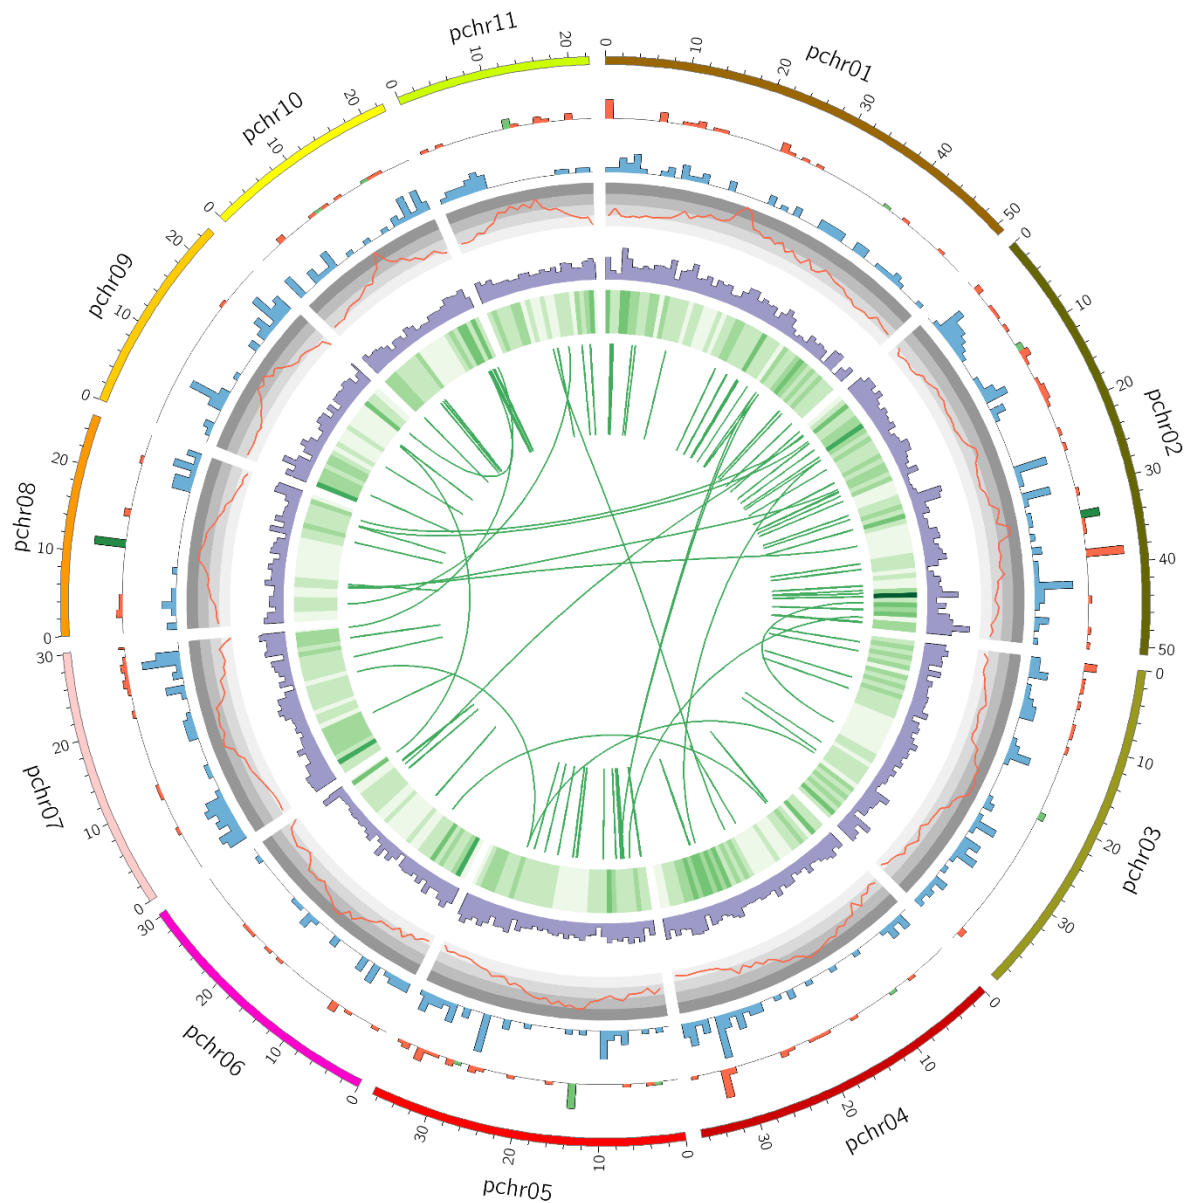

198

199 **Figure 1.** Circular plot of the *C. avellana* cv. Tombul genome summarizing functional  
200 features (Detail in Supplementary Tables 2-9). Working in from the outside: i. Ideogram of  
201 pseudochromosomes, with lengths marked in Mbp, ii. Histogram of miRNA (red), 5S rRNA  
202 (green) and 45S rRNA (dark green) gene density, iii. Histogram of tRNA genes (blue), iv.  
203 Line graph of repetitive content as % of total sequence (background shading from light to  
204 dark grey indicates the inter-quartile ranges), v. Histogram of protein-coding gene density  
205 (purple), vi. Heatmap of tandem gene duplications (darker green indicates more  
206 duplications), vii. Links showing repeated blocks of 3 or more adjacent gene paralogs,  
207 indicating past translocations and duplications.

208 abundant towards the ends of the chromosomes, while repetitive DNA content was  
209 concentrated near the centromeres. Protein-coding genes were also clustered into  
210 orthologous groups using OrthoMCL(Fischer et al. 2011). It was observed that the large  
211 number of orthologs (4,324) were found as adjacent copies or clusters, suggesting that these  
212 gene families have undergone local tandem duplications. Conserved blocks of 3 or more  
213 genes from different orthologous groups were also identified across the genome, and it was  
214 noted that most of these repeated blocks were also found in fairly close proximity to each  
215 other within a single chromosome, with only a handful showing evidence of possible  
216 historical inter-chromosomal duplications (Fig. 1, innermost tracks). The long arm of pchr01,  
217 pchr02 and parts of pchr10 seemed to have a higher density of duplicated gene blocks than  
218 the rest of the genome, suggesting that these regions may contain recombination hotspots  
219

## 220 **Repetitive landscape of the hazelnut genome**

221 Initial screening of the genome assembly with repetitive elements previously annotated in  
222 other eudicots detected few matches (11.87% of the genome), suggesting that the majority of  
223 repetitive elements in the genome are lineage-specific. Therefore, prediction tools were  
224 used to generate a database of *Corylus*-specific transposable elements based on known  
225 structural features of each type (Supplementary Information). When these were included,  
226 35.72% of the entire genome assembly was found to consist of interspersed repeats, while a  
227 further 2.41% was made up of simple repeats and low-complexity sequences  
228 (Supplementary Tables 1 & 2). Repetitive content varied widely along each chromosome,  
229 from 25% or less near the ends to 75-90% in the pericentromeric regions. Over 92.7% of the  
230 repetitive DNA comprised retroelements with long terminal repeats (LTRs). Over half of these  
231 sequences were incomplete LTR elements, with internal deletions and too much sequence  
232 diversification to positively assign them to a repeat family. Of the remainder, Copia elements  
233 were almost twice as abundant as Gypsy elements (Supplementary Figure 2). In the *Betula*  
234 *pendula* genome, some classes both of DNA transposons and non-autonomous  
235 retroelements were highly abundant (Salojärvi et al. 2017); however, this was not the case in

236 *C. avellana*, suggesting that expansion of these families took place only in the *Betula*  
237 lineage.

238 Taken together, our observations suggest that the repetitive landscape of hazelnut is  
239 relatively static, with few elements being highly active in recent evolutionary history.

240

#### 241 **Annotation of *C. avellana* functional RNAs**

242 Genes coding for proteins and functional non-coding RNAs were predicted and annotated as  
243 described below. A total of 477 predicted tRNA genes and 40 tRNA pseudogenes were  
244 distributed across all the chromosomes (Fig. 1, Supplementary Table 3), representing all 20  
245 amino acids and 54 of the possible anticodons. These included ten putative suppressor  
246 tRNAs, with anti-codons complementary to the TGA (9) or TAA (1) stop codons. tRNA types  
247 and their codon preferences were also analyzed in three other tree species (Supplementary  
248 Table 4 & Figure 3). Ribosomal RNA genes were found on pchr02 & pchr08 (45S rDNA) and  
249 pchr05 & pchr11 (5S rDNA), while ribosomal proteins were distributed among all  
250 chromosomes except pchr11 (Supplementary Tables 5 & 6).

251 MicroRNAs are ubiquitous post-transcriptional regulators in plants and a previous study  
252 identified putative miRNA genes in the draft *C. avellana* cv. Jefferson genome (Avsar and  
253 Aliabadi 2017). In the Tombul genome, 153 putative conserved miRNA genes were  
254 annotated, including members of 52 different miRNA families (Supplementary Table 7). The  
255 majority (95/153) of predicted mature miRNA sequences were 21 nt in length, and the most  
256 abundant miRNAs were the well-characterized miR156, miR171 & miR399 families, with 16,  
257 12 & 12 candidates respectively (Supplementary Figure 4). Mapping the predicted pre-  
258 miRNAs to assembled transcriptome sequences found evidence for expression of 22/52  
259 miRNA families under normal growth conditions, many of which have also been functionally  
260 annotated in other species (Table 3).

261

262

263

264 **Table 3. miRNA families expressed in *C. avellana* under normal growth conditions**

| miRNA family (loci in genome)                                                                       | Targets confirmed in other species                                         | Reported Biological Functions                   |
|-----------------------------------------------------------------------------------------------------|----------------------------------------------------------------------------|-------------------------------------------------|
| miR156/157 (16)                                                                                     | Squamosa-promoter Binding Protein (SBP) box transcription factors          | Shoot & leaf development                        |
| miR160 (2)                                                                                          | Auxin Response Factor (ARF) proteins                                       | Auxin signalling, plant development             |
| miR162 (1)                                                                                          | Dicer-Like 1 (DCL1) proteins                                               | miRNA processing                                |
| miR164 (3)                                                                                          | NAC domain transcription factors                                           | Shoot apical meristem formation, abiotic stress |
| miR165/166 (4)                                                                                      | HD-Zip transcription factors                                               | Meristem & leaf development                     |
| miR167 (5)                                                                                          | Auxin Response Factor (ARF) proteins                                       | Floral development, stress responses            |
| miR169 (8)                                                                                          | CCAAT-box binding / NF-Y transcription factors                             | Abiotic & biotic stress responses               |
| miR170/171 (12)                                                                                     | GRAS-domain or SCARECROW-like transcription factors                        | Root patterning, light & gibberellin signalling |
| miR172 (4)                                                                                          | APETALA2-like transcription factors                                        | Plant development                               |
| miR319 (4)                                                                                          | TCP-like transcription factors                                             | Leaf development, abiotic stress response       |
| miR393 (1)                                                                                          | F-box proteins & bHLH transcription factors                                | Root development, auxin signalling              |
| miR394 (4)                                                                                          | F-box proteins                                                             | Plant development, stress responses             |
| miR396 (3)                                                                                          | GRF transcription factors, rhodenase-like proteins, kinesin-like protein B | Growth regulation                               |
| miR403 (3), miR482 (5), miR529 (1), miR1863 (2), miR5021 (7), miR6288 (1), miR8738 (1), miR9752 (1) |                                                                            | <i>No experimentally confirmed targets</i>      |

265

266 Other potential targets for the miRNAs identified in this study were predicted by searching for  
 267 miRNA complementary sequences in *C. avellana* transcriptome sequences. Transcripts with  
 268 potential miRNA target sites were then annotated with GO terms (Supplementary Table 8;  
 269 Fig. 2A,B). In the Biological Process domain, the greatest number of GO annotations were  
 270 related to cellular organization, communication and signal transduction, while in the  
 271 Molecular Function domain nucleic acid binding, kinase activity, and protein binding were  
 272 most prevalent. These observations suggest that under normal conditions, *C. avellana*  
 273 miRNAs are primarily involved in the regulation of cell growth and tissue development.

274

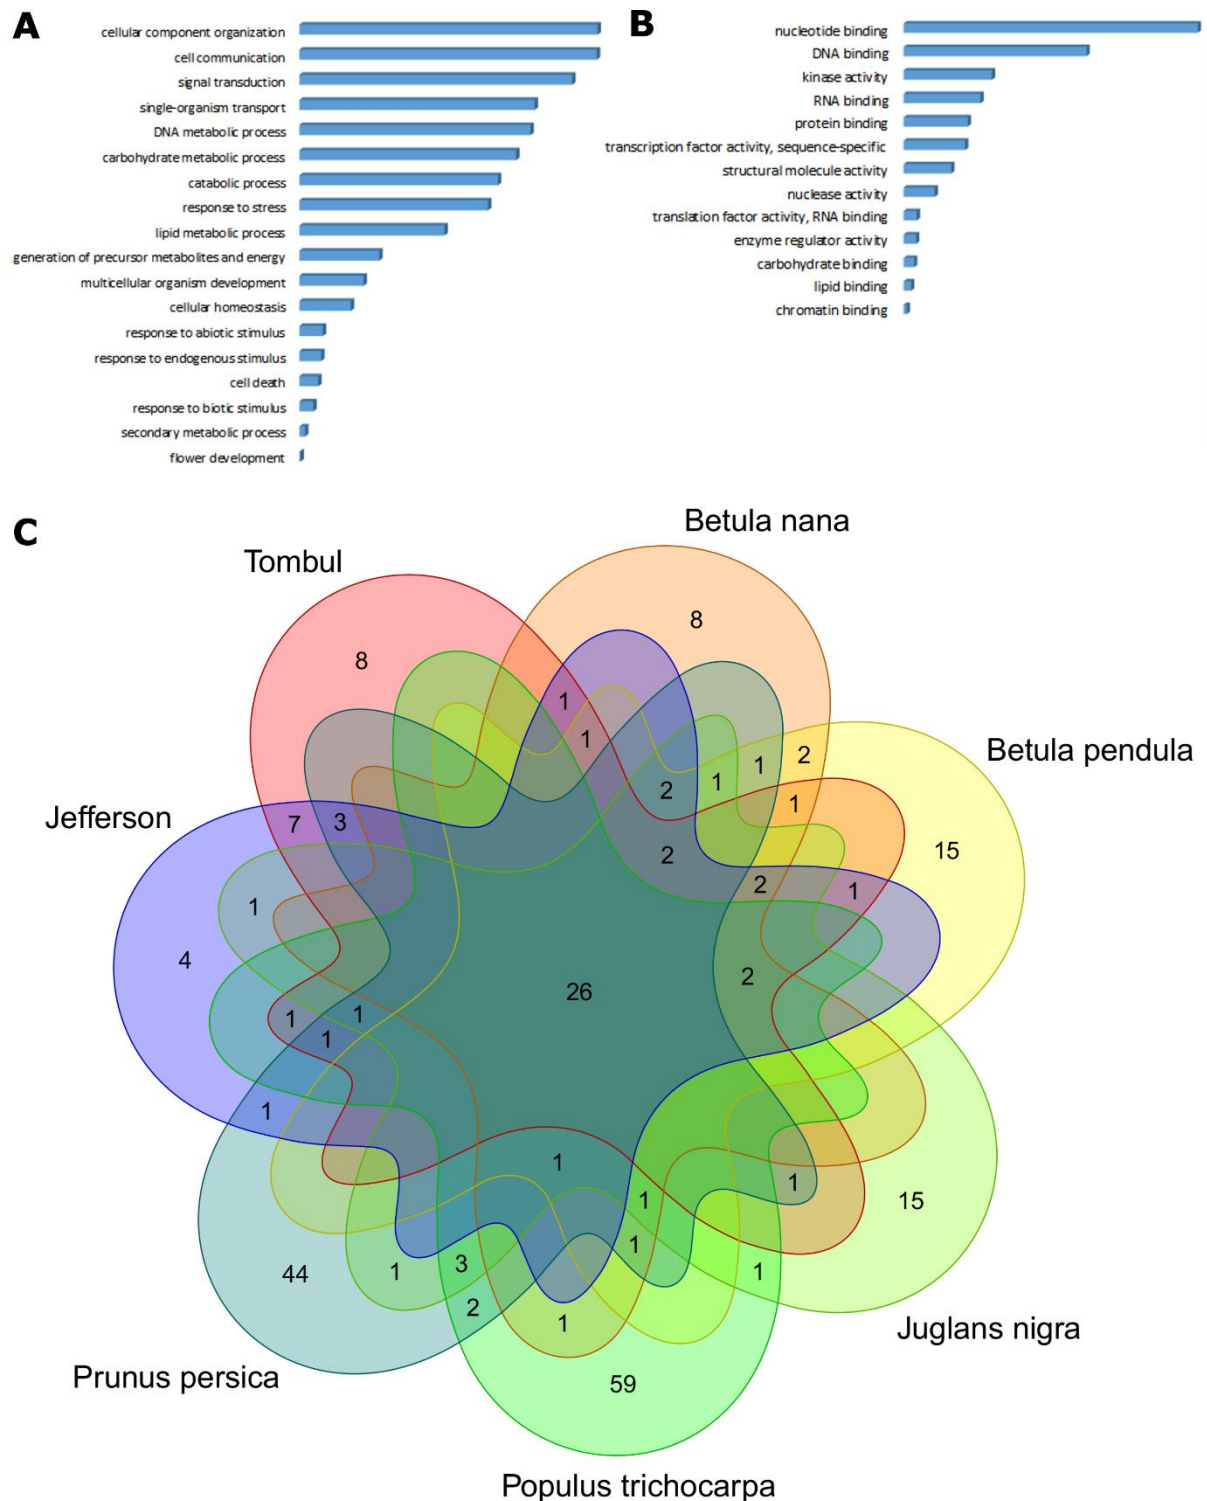

275

276 **Figure 2. A, B.** Most abundant GO terms assigned to predicted miRNA target mRNAs in the  
 277 Biological Process (A) and Molecular Function (B) domains. **C.** Venn diagram of conserved  
 278 plant miRNA families identified in *C. avellana* cv Tombul and other published tree genomes.

279

280 The miRNA complement of *C. avellana* cv. Tombul was also compared with that predicted  
281 from the draft cv. Jefferson genome and 5 other tree species (Fig. 2C). While there was a  
282 well-conserved group of 26 miRNA families common to all the species examined, there were  
283 also miRNA families that were unique to each species. Surprisingly, there were 8 miRNA  
284 candidates that were predicted only in Tombul but not Jefferson, and 4 for which the reverse  
285 was true. Although there were no transcripts for these miRNAs in our dataset, 2 of them  
286 (miR1520 & miR7486) were recently identified by small RNA sequencing from dried  
287 hazelnuts (Aquilano et al. 2019); further experiments would be useful to confirm whether the  
288 other candidates are functional miRNAs. Also of interest are miR1863, miR8148 and  
289 miR8738, which were predicted in both Tombul and Jefferson but none of the other tree  
290 species, and were supported by transcriptome data. miR1863 was originally identified in the  
291 rice genome but has also been reported to be present in melon (*Curcumis melo*) and Norway  
292 spruce (*Picea abies*); this is the first time it has been predicted in the Fagales, suggesting  
293 that it may have a lineage-specific function. Both miR8148 and miR8738 were found among  
294 small RNAs in dried nuts; it has also been demonstrated that some nut miRNAs can interact  
295 with genes from the mammalian immune system, such as miR-156c with the TNF- $\alpha$  receptor  
296 (Aquilano et al. 2019). In the light of the known allergenicity of hazelnuts, further  
297 investigation of these *Corylus*-specific nut miRNAs would be of great interest to see whether  
298 they might have any effects on ingestion.

299

### 300 **Gene complement of *C. avellana* cv. Tombul**

301 Using an *ab initio* method, 50,906 gene models were predicted in the repeat-masked  
302 pseudochromosomes. These were filtered using Tombul transcriptome sequences to include  
303 only transcribed regions, resulting in 28,409 high-confidence protein-coding gene models  
304 (Supplementary Table 9). Functional annotation of predicted genes was carried out by  
305 sequence similarity to known plant proteins using 3 different strategies; Mercator4 was used  
306 to assign predicted protein sequences to MapMan 'Bins', while the Trapid web server was used  
307 to assign Gene Ontology (GO) terms and search for conserved protein domains. The MapMan

308  
309  
310  
311  
312  
313  
314  
315  
316  
317  
318  
319  
320  
321  
322  
323  
324  
325  
326  
327  
328  
329  
330  
331  
332  
333

Bins represent plant-specific molecular components and pathways; 37.24% of gene models (10,579) were classified by this approach; a further 6,674 were functionally annotated with their closest matching protein, but these had not been assigned to a bin (Supplementary Table 10). The most populous bins were Protein and RNA processing (11.39% & 8.25% of all gene models respectively), followed by Signalling and Stress Responses with 5.36% and 3.98% (Figure 3A). Expansion of specific gene families may indicate functions that have been important in the evolution of *C. avellana*. Therefore, the bin assignments were compared with those for 6 other representative plant species; 62 bins, associated with diverse functions, were identified for which the *C. avellana* genome contains at least 50% more representatives than any of the reference plant genomes (Supplementary Table 11).

Using the Gene Ontology approach, 69.6% of gene models (20,113) were annotated with one or more GO terms, while 71.8% (20,404) contained at least one conserved protein domain from the InterPro database (Supplementary Tables 9 & 12), discussed more fully in the Supplementary Information. Clustering of similar Biological Process GO terms again found those associated with Protein Metabolism to be most abundant, followed by Stress responses; in addition several other aspects of metabolism, regulation and development were highlighted (Fig.3B). All three annotation approaches identified a large complement of genes encompassing functions that are ubiquitous in plant genomes; however, gene models predicted to be involved in stress responses were notably abundant. Furthermore, almost 8,000 gene models were not annotated by any of these approaches, indicating the need for further study to elucidate their functions.

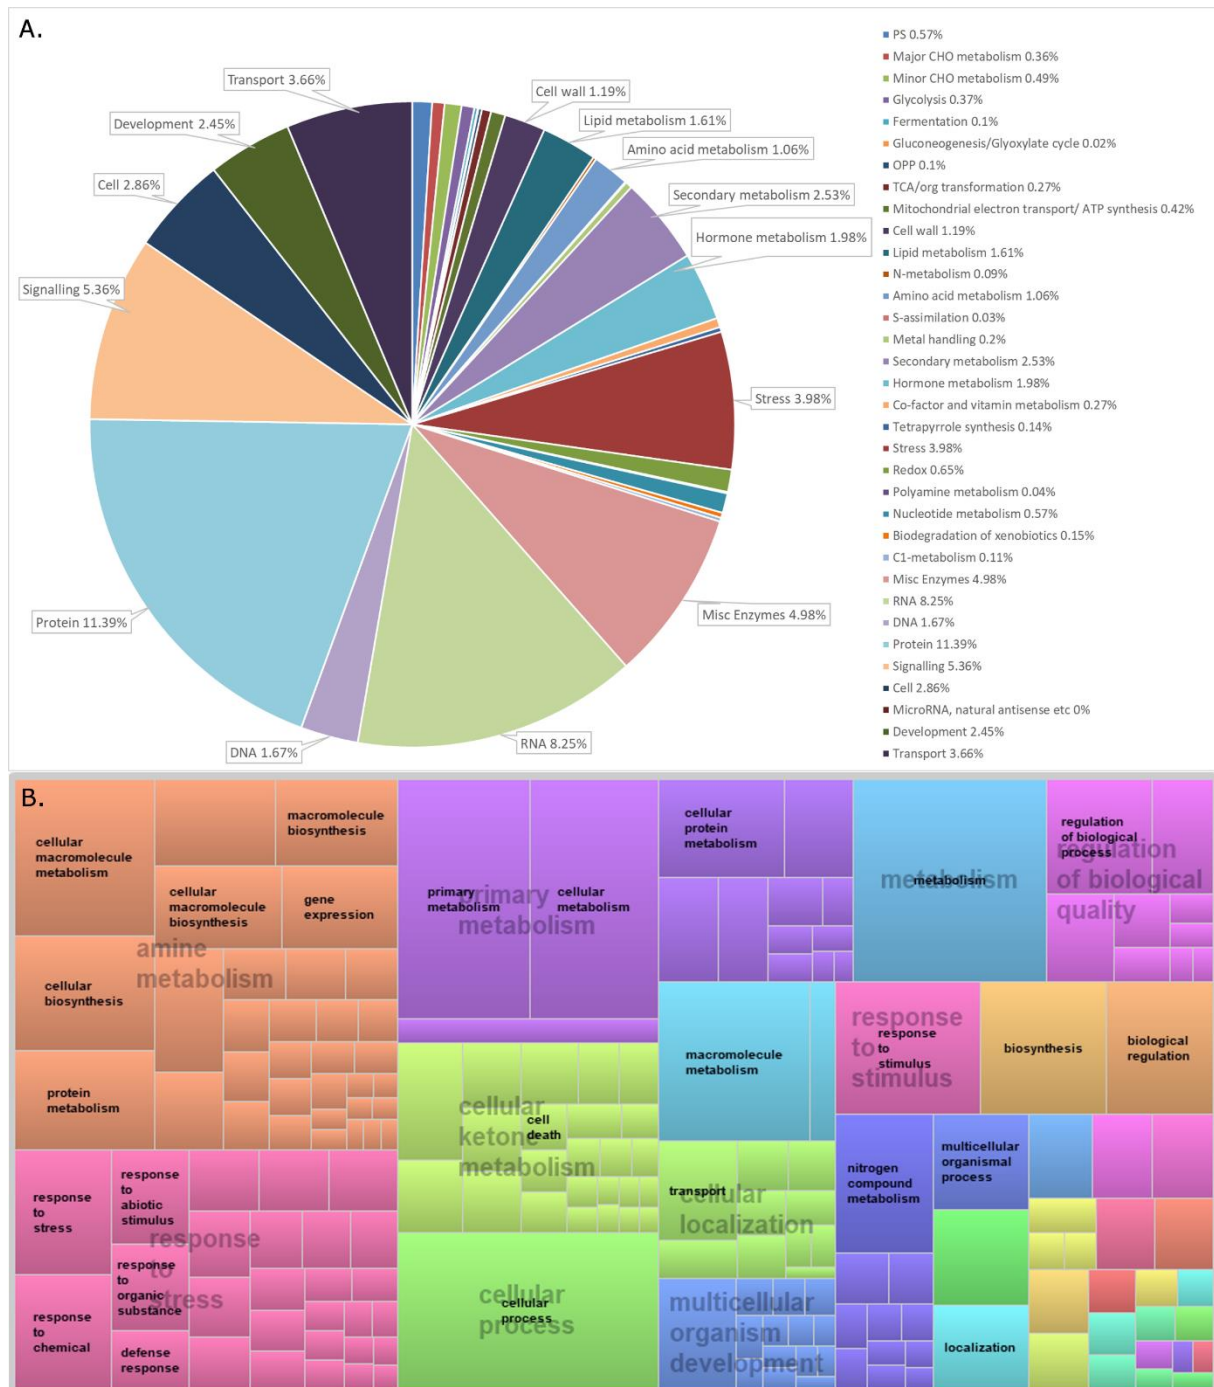



## 342 **The *MLO* gene family in *C. avellana* as a target for powdery mildew resistance**

343 MLO proteins were first identified in barley, where a loss-of-function mutation in the gene  
344 Mildew resistance Locus O was found to confer durable resistance to nearly all strains of the  
345 barley powdery mildew pathogen, *Blumeria graminis* f.sp. *hordei* (Büschges et al. 1997).  
346 Although powdery mildew is caused by different fungal species on each plant host, resistance  
347 to mildew infection of *MLO* mutants has since been observed in *A. thaliana*, tomato, and pea,  
348 (Acevedo-Garcia et al. 2014) and introduced by gene editing in wheat (Wang et al. 2014).  
349 Therefore, this mechanism seems to be functionally conserved across diverse plant species  
350 and could present a promising target for developing *E. corylacearum* powdery mildew  
351 resistance in hazel.

352 The annotation pipeline described above identified 24 gene models that had high similarity to  
353 the InterPro domain IPR004326, 'MLO-related protein'. These were examined in detail and  
354 manually re-annotated as described in Supplementary Table 13. On the basis of sequence  
355 similarity and secondary structure prediction, 11 of these gene models were found to encode  
356 full-length MLO proteins, while most of the remainder appeared to be truncated orthologs of  
357 the full-length genes. In order to identify those most likely to be involved in powdery mildew  
358 infection, the predicted protein sequences were aligned with the original MLO protein from  
359 barley (HvMLO), those previously described in *A. thaliana*, and from apple (Pessina et al.  
360 2014), the most closely related species to hazel in which this family has been studied in depth.  
361 A phylogenetic tree was used to cluster the sequences, which formed 8 clades, in agreement  
362 with previous studies (Figure 4A & Supplementary Figure 5). No *C. avellana* MLO proteins  
363 were found in Clade IV, which consists mostly of monocot mildew resistance genes, or Clade  
364 VIII, which has only been identified in a subset of Rosaceae species (here represented by  
365 MdMLO20). Interestingly, the largest number of *C. avellana* MLO genes (4) fell into Clade V,  
366 which also contains all of the dicot MLO genes that have been demonstrated to confer  
367 susceptibility to powdery mildew infection – of those shown here, *AtMLO2*, 6 & 12, along with

368

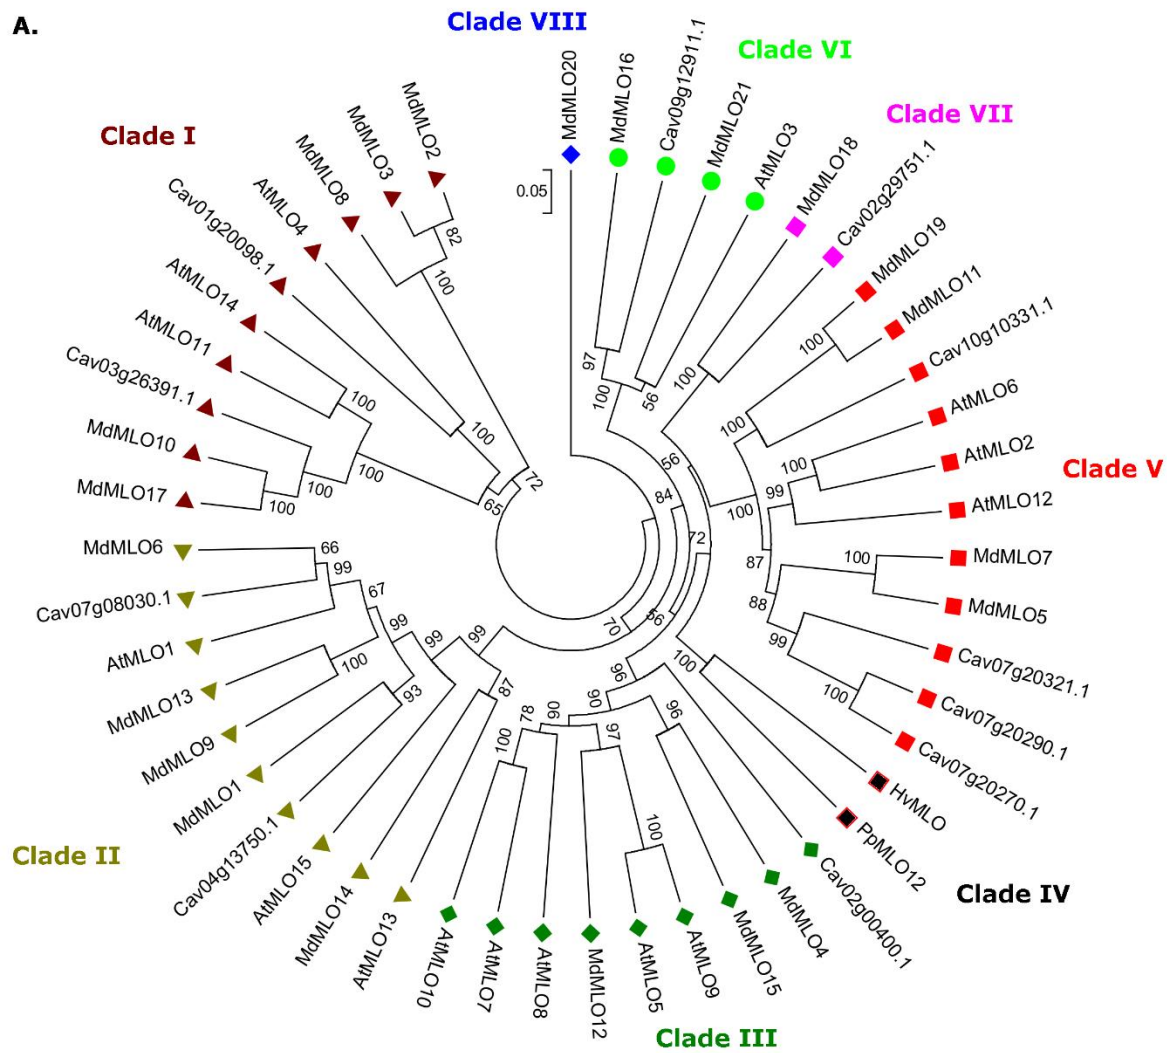

369  
 370 **Figure 4. A.** Phylogenetic clustering of *C. avellana* MLO gene models with those from *A.*  
 371 *thaliana* & *Malus domestica*, using the UPGMA approach. Branch lengths are scaled to the  
 372 no. of amino acid differences per site (p-distance method); node confidence values are % of  
 373 1000 bootstrap replications. **B.** Schematic of gene model predictions in pseudochromosome  
 374 regions containing MLO gene models from clades V & VII.

375 *MdMLO19*. Clade VII was not clearly separated from Clade V in this analysis, suggesting that  
376 these genes should also be studied for any potential role in PM.

377 The genome context of the Clade V & VII *MLO* genes was also examined in detail (Figure 4B).  
378 Strikingly, all five of these genes had truncated homologs nearby. Two disrupted *MLO* genes  
379 with high sequence identity to Cav02g29751 were found in the 50 kb following of the full-length  
380 gene. In the first, an insertion of two TRIM elements near the beginning of the gene had split  
381 it into two separate open reading frames. In the second, a stop codon truncated the predicted  
382 protein after the first 180 amino acids, but the remaining unexpressed exon sequences were  
383 still present further downstream. Similarly, Cag10g10331 was found adjacent to a probable  
384 tandem duplicate with an N-terminal truncation, while two other truncated *MLO*-like genes,  
385 were located within 50 kb on the opposite strand. Finally, the cluster on pchr07 contains three  
386 full-length genes that are all closer in homology to each other (Cav07g20270, 20290 & 20231)  
387 than any other *MLO* genes, interspersed with multiple truncated gene copies. In one case,  
388 two partial *MLO*-like genes appear to have been spliced together into a single, longer gene,  
389 possibly as a result of a TRIM insertion into one of the introns. Taken together, these  
390 observations suggest that the Clade V/VII *MLO* genes have undergone repeated tandem  
391 duplications followed by degeneration of many of the copies during the development of the  
392 hazelnut genome. Most of the other hazelnut *MLO* genes (with the exception of Cav4g13750)  
393 did not have degenerate copies in the genome, which may suggest that there has been specific  
394 selective pressure for diversification of the Clade V/VII *MLO* genes.

### 395 **Genomic insights into hazelnut allergenicity**

396 Hazelnut allergens to date have been identified empirically by screening hazelnut protein  
397 extracts with sera from nut allergic patients. Proteins which show specific IgE reactivity were  
398 then partially identified by Edman sequencing; this provides enough sequence to design  
399 primers and retrieve the complete coding sequence by RT-PCR (Beyer et al. 2002; Schocker  
400 et al. 2004). By this approach, to date 11 hazelnut allergens have been identified and recorded  
401 in the WHO allergen database ([www.allergen.org](http://www.allergen.org)), while a 12th (Cor a TLP) has been reported

402 but is not yet confirmed (Palacín et al. 2012). We used the published sequences of these  
 403 allergens to identify their coding genes, and homologs, in our genome annotation (Table 4).  
 404 We found gene models predicted to encode proteins with 96-100% amino acid identity to all  
 405 the known allergens; the few variations can be attributed to sequence diversity between  
 406 hazelnut cultivars.

407 **Table 4. Genes encoding hazelnut allergen proteins in *C. avellana* cv. Tombul**

| Allergen name                        | Allergen group                                                                                                                    | Reference sequences*                                 | Closest gene model(s)      | Identity (%)                      | Genome orthologs                                                                                                    |
|--------------------------------------|-----------------------------------------------------------------------------------------------------------------------------------|------------------------------------------------------|----------------------------|-----------------------------------|---------------------------------------------------------------------------------------------------------------------|
| <b>Cor a 1.01</b><br>(1.0101-1.0104) | Major hazelnut allergen. Stress-induced proteins of 159-161 aa, members of the PR-10 protein family. Cross-reactive with Bet v 1. | CAA50327.1                                           | Cav01g12300                | 98.75                             | All expressed from a single locus on pchr01, containing 12 <i>Cor a 1</i> genes.                                    |
|                                      |                                                                                                                                   | CAA50328.1                                           | Cav01g12340                | 99.38                             |                                                                                                                     |
|                                      |                                                                                                                                   | CAA50325.1                                           | Cav01g12300                | 98.13                             |                                                                                                                     |
|                                      |                                                                                                                                   | CAA50326.1                                           | Cav01g12340                | 98.75                             |                                                                                                                     |
| <b>Cor a 1.02</b>                    |                                                                                                                                   | CAA96548.1                                           | Cav01g12380                | 96.88                             | A gene family with 40-50% identity to <i>Cor a 1</i> also has 8 members in this region, and 5 on other chromosomes. |
| <b>Cor a 1.03</b>                    |                                                                                                                                   | CAA96549.1                                           | Cav01g12400<br>Cav01g12470 | 96.23<br>96.23                    |                                                                                                                     |
| <b>Cor a 1.04</b><br>(1.0401-1.0404) |                                                                                                                                   | AAD48405.1<br>AAG40329.1<br>AAG40330.1<br>AAG40331.1 | Cav01g12260                | 97.52<br>99.38<br>100.00<br>96.27 |                                                                                                                     |
| <b>Cor a 2.01</b><br>(2.0101-2.0102) | Profilins. Actin-binding proteins of 131 aa                                                                                       | AAK01235.1<br>AAK01236.1                             | Cav11g14860<br>Cav11g14860 | 98.47<br>98.47                    | All >80% identity: Cav07g08730, Cav11g14870, Cav11g14910, Cav11g14920                                               |
| <b>Cor a 6</b>                       | Isoflavone reductase-like                                                                                                         | AGU09563.1                                           | Cav06g05250                | 99.70                             | Cav06g05240 (83.4% identity)                                                                                        |
| <b>Cor a 8</b>                       | nsLTP (Non-specific lipid transfer protein), PR-14                                                                                | AAK28533.1                                           | Cav09g17752                | 100.00                            | Nine other putative nsLTPs were identified, all <50% identity to <i>Cor a 8</i>                                     |
| <b>Cor a 9</b>                       | Legumin / 11S globulin seed storage protein                                                                                       | AAL73404.1                                           | Cav11g01135<br>Cav11g01145 | 99.0<br>97.0                      | 2 predicted legumins on pchr04 (50.6% identity to <i>Cor a 9</i> )                                                  |
| <b>Cor a 10</b>                      | BiP, Luminal binding protein                                                                                                      | CAC14168.1                                           | Cav03g23015                | 99.0                              | 40 other HSP70-like, all <50% identity                                                                              |
| <b>Cor a 11</b>                      | Vicilin / 7S globulin seed storage protein                                                                                        | AAL86739.1                                           | Cav02g11145                | 99.1                              | 23 aa longer than reference. No predicted orthologs                                                                 |
| <b>Cor a 14</b>                      | 2S Albumin, seed st. protein                                                                                                      | ACO56333.1                                           | Cav03g28025                | 99.3                              | Cav03g28030 is 75% identical                                                                                        |
| <b>Cor a 12</b>                      | Oleosins                                                                                                                          | AAO67349.2                                           | Cav05g25120                | 100.0                             | Cav03g05140 (60% identity to <i>Cor a 12</i> )<br>Cav06g12940 (40% identity to <i>Cor a 13</i> )                    |
| <b>Cor a 13</b>                      |                                                                                                                                   | AAO65960.1                                           | Cav08g12860                | 99.3                              |                                                                                                                     |
| <b>Cor a 15</b>                      |                                                                                                                                   | MK737923.1**                                         |                            | Nd**                              |                                                                                                                     |
| <b>Cor a TLP</b>                     | Thaumatococin-like proteins, PR-5 family,                                                                                         | Palacin et al. 2012(Palacín et al. 2012)             | Cav09g00690                | 88.0*                             | Of 48 predicted TLPs in genome, 7 have >75% identity to Mal d 2 / Pru p 2                                           |

408 \*Genbank accession ID of protein sequences are given

409 \*\*MK737923 sequence is not public at the time of writing, but based on its size and similarity to *Cor a*  
 410 12, Cav03g05140 is the best candidate gene.

411 Food allergens frequently comprise groups of closely related proteins, that show IgE cross-  
412 reactivity including across species. 'Isoallergens' are defined as proteins from the same  
413 species that show cross-reactivity and at least 67% amino acid identity. Within these,  
414 'isoforms' are considered to be variants of the same allergen, typically with >90% identity  
415 (Chapman et al. 2007). The first and most fully characterized hazelnut allergen is Cor a 1,  
416 which is reported to include 4 isoallergens, two of which themselves have 4 isoforms  
417 (Breiteneder et al. 1993; Lüttkopf et al. 2002). Cor a 1 is also cross-reactive with paralogs from  
418 other Betulaceae species, such as the pollen allergens Bet v 1 from birch, and Car b 1 from  
419 hornbeam.

420 We found that gene models for all the previously reported Cor a 1 proteins were found within  
421 a single locus on pchr01 (from 12.3-12.7 Mb); this locus included 20 predicted Cor a 1  
422 homologs, interspersed with unrelated genes. We carried out a phylogenetic comparison of  
423 all the predicted Cor a 1 protein sequences (Figure 5), revealing that the relationship between  
424 these and the established isoallergen nomenclature is complex. Twelve of the genes were  
425 highly conserved with reported Cor a 1 sequences; all of these encoded proteins of 159-161  
426 amino acids in length, and had a fixed 2 exon structure with the intron interrupting codon 62,  
427 typical of the Bet v 1 allergens (Hoffmann-Sommergruber et al. 1997). The remaining eight  
428 homologs, along with five others found on other chromosomes, formed a group with variable  
429 intron-exon structure and protein sizes (112-172 aa) and only 40-50% identity to Cor a 1.  
430 These were labelled as 'Cor a 1-like' proteins, none of which has been shown to have  
431 allergenic activity.

432 From the highly conserved Cor a 1 group, two genes encoding 160 amino acid proteins are  
433 predicted to express the four isoforms of Cor a 1.01, with Cor a 1.0101 and Cor a 1.0103 most  
434 closely matching Cav01g12300, while Cor a 1.0102 and Cor a 1.0104 matched Cav01g12340.  
435 We suggest that different alleles of these two genes account for the multiple isoform variants.  
436 Cav01g12380 was the only close match to Cor a 1.02; in contrast, Cor a 1.03 had no single  
437 best match, but had >90% identity to a cluster of six genes encoding 159 amino acid proteins,

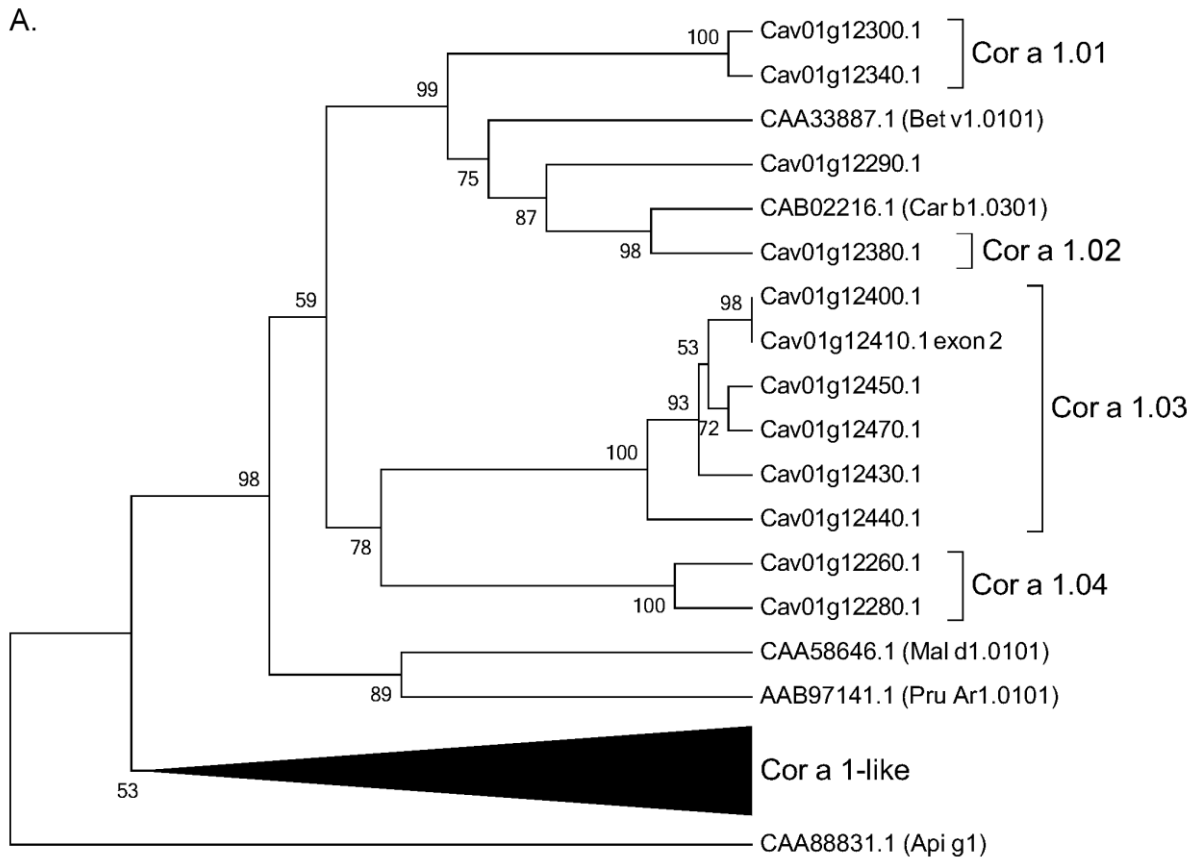

B.

|                                    | <i>Cora 1</i> | <i>Cora 2</i> | <i>Cora 6</i> | <i>Cora 8</i> | <i>Cora 9</i> | <i>Cora 10</i> | <i>Cora 11</i> | <i>Cora 12</i> | <i>Cora 13</i> | <i>Cora 14</i> | <i>Cora 15</i> | <i>Cora T1p</i> |
|------------------------------------|---------------|---------------|---------------|---------------|---------------|----------------|----------------|----------------|----------------|----------------|----------------|-----------------|
| Primary sensitization from nuts    |               |               | X             | X             |               | X              | X              | X              | X              | X              | X              | ?               |
| Primary sensitization from pollen  | X             | X             | X             |               |               | X              |                |                |                |                |                |                 |
| Linked to severe/systemic reaction |               |               | X             | X             |               | X              |                |                | X              |                |                |                 |
| Seed storage protein               |               |               |               |               | X             | X              |                |                | X              |                |                |                 |
| Pathogenesis Response (PR) protein | X             |               | X             |               |               |                |                |                |                |                |                | X               |
| Oil-body associated                |               |               |               |               |               |                | X              | X              |                | X              |                |                 |
| Heat resistant                     |               |               | X             | X             |               | X              | X              | X              | X              | X              | X              | ?               |
| Low pH & Protease resistant        | X             |               | X             | *             |               | *              | ?              | ?              | X              | ?              | ?              | ?               |
| Disulfide bond stabilized          |               |               | X             | X             |               |                |                |                | X              |                |                | X               |

438

439 **Figure 5. A.** Clustering of Cor a 1 sequence homologs from the hazelnut genome, using the

440 UPGMA method on the basis of p-distance. Node values are % of 1000 bootstrap

441 replications. Homologs from other species of Betulaceae (Bet v 1, Car b 1) and Rosaceae

442 (Mal d 1, Pru Ar 1) are indicated by their Genbank accession IDs. Celery allergen Api g 1

443 was included as an outgroup. **B.** Shared allergenic, functional and biochemical

444 characteristics of known and suspected hazelnut allergens. \*11S & 7S globulins are partially

445 digested, but leave smaller, protease-resistant polypeptides.

446 making all of these potential new isoforms of this allergen. All four reported isoforms of Cor a  
447 1.04 appear to be allelic variants of Cav01g12260, which is identical in sequence to Cor a  
448 1.0403. However, Cav01g12280 is also >90% identical to Cor a 1.04, and so may encode  
449 additional isoforms. In addition, Cav01g12290 encodes the nearest homolog of Bet v 1.01 in  
450 the *C. avellana* genome, but falls between Cor a 1.01 & Cor a 1.02 (75% and 85% identity  
451 respectively); therefore, it expresses a putative new isoallergen, pCor a 1.05. Finally, the  
452 remaining eight Cor a 1 homologs in this locus, along with five others located on other  
453 chromosomes, formed a group of predicted proteins with more diverse sizes (112-172 aa) and  
454 only 40-50% identity to the known hazelnut allergens. These were labelled as 'Cor a 1-like'  
455 proteins, none of which has been shown to have allergenic activity. All putative new  
456 isoallergens and allergen-like gene models are listed in Table S14.

457 Genomic analysis of most of the other known hazelnut allergens was much more  
458 straightforward. Cor a 6, and Cor a 8 – 14 all matched single gene models with > 99% identity,  
459 indicating that these are the unique genes expressing these allergens. Cor a 15 is a recently  
460 reported oleosin of similar size to Cor a 12 but differing N- and C-terminal sequences  
461 ([www.allergen.com](http://www.allergen.com)). Although the protein sequence of Cor a 15 is not in the public domain at  
462 the time of writing, based on the available information Cav03g05140 is the probable gene.

463 Cav11g01135, which encodes Cor a 9.0101, had an adjacent 97% identical duplicate  
464 (Cav11g01145) encoding a putative new isoform; similarly, Cav06g05240 and Cav03g28030  
465 might be isoallergens of Cor a 6 (Cav06g05250) and Cor a 14 (Cav03g29025) respectively.  
466 The profilin allergen Cor a 2 has two reported isoforms, both of which were equally close  
467 matches to Cav11g14860. However, two potential new isoallergens (Cav07g08730 and  
468 Cav11g14870) of >80% identity to Cor a 2 were also identified, and were identical in sequence  
469 to 2 profilins previously isolated from hazelnut pollen (Jimenez-Lopez et al. 2012). As with the  
470 other potential isoallergens, serological tests would be required to determine whether or not  
471 these homologs are allergenic. Remnants of a third profilin gene, which appears to have been

472 split in half by a local chromosome rearrangement, were found in the vicinity of Cor a 2  
473 (Cav11g14910 & Cav11g14920).

474 Thaumatin-like proteins (TLPs) are known to be important causes of fruit allergy, especially in  
475 the Rosaceae. Palacin et al. (Palacín et al. 2012) isolated a TLP from *C. avellana* and found  
476 cross-reactivity with sera from fruit-allergic patients, but in <10% of cases. The Genbank  
477 accession ID given for Cor a TLP in the aforementioned paper actually refers to an apple TLP;  
478 however, based on the peptide sequences also reported, we inferred that the Cor a TLP tested  
479 was encoded by Cav09g00690. This is one of 48 predicted TLPs found in the hazelnut  
480 genome; seven of these, including Cav09g00690, have >75% identity to known allergens Mal  
481 d 2 (apple) and Pru p 2 (peach). Therefore, although TLPs have not yet been demonstrated  
482 to be allergenic in hazelnut, there is a high potential for cross-reactivity between these genes  
483 and homologous fruit allergens.

484 In summary, we identified complete gene models encoding all known hazelnut allergens and  
485 several previously unreported putative allergenic proteins, including nine new isoforms, four  
486 new isoallergens, and suspected new cross-reactive oleosin and TLP proteins (Supplementary  
487 Table 14).

## 488 **Discussion**

### 489 **Towards a reference genome for *C. avellana***

490 Hazelnut is typical of a number of important crop species for which, until recently, limited  
491 genome data has been available. The publicly available *C. avellana* var. 'Jefferson' draft  
492 genome sequence made it possible to identify the majority of gene sequences, but not their  
493 chromosomal locations. Here, we aimed to produce a reference quality genome sequence  
494 for the Turkish cultivar 'Tombul' in a time and cost-effective manner. This required 3 different  
495 sequencing technologies that provided data with different size ranges: 0.1-1 kbp (Illumina  
496 paired-end), 1-10 kbp (NanoPore), and 10 kbp – 10 Mbp (Dovetail). None of these methods



497 individually or in pairs was sufficient to reconstruct the whole genome but combining all three  
498 together produced a chromosome-scale genome assembly.

499 The chromosomes presented here have a total length of 370 Mb, about 2.1% shorter than  
500 the estimated genome size. Each chromosome still contains several hundred small  
501 sequence gaps (Table 2), the actual size of which is not known. Also, it is likely that  
502 telomeric and centromeric repeats are more condensed in our assembly than in the physical  
503 chromosomes due to their extended repetitive structure. These two factors could explain  
504 most or all of the 'missing' sequence length.

505 Apart from these small differences, we found the chromosomes to be highly consistent with  
506 existing cytogenetic data and genetic maps, suggesting that they accurately represent the  
507 structure of the genome. Therefore, this genome assembly will be an excellent resource for  
508 accelerating breeding through novel molecular marker design and mapping candidate genes  
509 for important traits of interest, especially in 'Tombul', the most highly valued Turkish variety.  
510 Further high-quality assemblies from different individuals, such as that currently being  
511 constructed for 'Jefferson' (Snelling et al. 2018) will be invaluable for identifying the degree of  
512 variation and chromosome rearrangement within the hazelnut population.

513

#### 514 **Comparison of the *C. avellana* genome with other horticultural crops**

515 With the greatly reduced cost of high-throughput sequencing technologies, the genomes of a  
516 number of important nut tree species have been sequenced in recent years, such as Persian  
517 walnut, *Juglans regia* (Martínez-García et al. 2016), and pistachio, *Pistacia vera* (Zeng et al.  
518 2019). The closest relative of hazelnut for which a complete genome is available is silver  
519 birch (*Betula pendula*), for which pseudochromosomes were generated by anchoring  
520 genome scaffolds on to a high-density genetic map (Salojärvi et al. 2017). Among these  
521 examples *C. avellana* has both the smallest genome (birch: 440 Mb, walnut & pistachio ~600  
522 Mb) and the lowest proportion of repetitive elements (38%; others range from 50-70% of the  
523 whole genome). These features make hazelnut an attractive model for genomic studies.  
524 While local gene replications were widespread, as in *B. pendula* there was no evidence of

525 any recent whole-genome duplication event (Salojärvi et al. 2017). Tree species are often  
526 highly heterozygous, which means that *de novo* sequencing assemblies are often  
527 significantly longer than the expected size (Martínez-García et al. 2016; Zeng et al. 2019)  
528 due to some regions being represented twice. We observed the same effect in our  
529 assemblies that relied only on short reads; however, incorporating ~9.3x genome coverage  
530 of long Nanopore reads reduced the assembly to the expected length, suggesting that the  
531 heterozygous regions were resolved by this method (Table 1). This gives us confidence that  
532 we can make accurate assessments of numbers of functional elements from the *C. avellana*  
533 genome.

534 The number of genes annotated in each of these genomes is comparable, with the 28,409  
535 reported here being very similar to *B. pendula* (28,153) and a little less than walnut &  
536 pistachio (~32,000 each; some of the greater number might be attributable to heterozygous  
537 duplicates). However, each of these genomes has different gene families that have  
538 undergone lineage-specific expansion, which may indicate their functional importance to their  
539 species; for example, *J. regia* has an unusually large complement of genes for polyphenol  
540 synthesis (Martínez-García et al. 2016). Similarly, we found 63 functional classifications  
541 (using the MapMan ontology) in which *C. avellana* had more than twice as many genes as all  
542 of the other plants examined (Supplementary Table 11). The largest groups of related  
543 functions among these classifications were components of the vesicle trafficking and RNA  
544 biosynthesis pathways; for example, HEN1, which is essential for stabilizing small regulatory  
545 RNAs (Bologna and Voinnet 2014). These observations suggest that *C. avellana* has  
546 developed diverse systems for regulating protein function at both transcriptional and post-  
547 transcriptional levels. Furthermore, 27 genes encoding triterpene synthases were identified  
548 20 for type-II patatin-like phospholipase A2. Both of these classes of enzymes are reported  
549 to be involved in stress and defense responses in plants, the former by production of  
550 secondary metabolites (Thimmappa et al. 2014) and the latter by regulating cell death (La  
551 Camera et al. 2009). Closer examination of these gene families could reveal important  
552 aspects of the response to infection of hazelnut.

553  
554  
555  
556  
557  
558  
559  
560  
561  
562  
563  
564  
565  
566  
567  
568  
569  
570  
571  
572  
573  
574  
575  
576  
577  
578  
579  
580

## **Genomic insights into sources of powdery mildew resistance**

The genome sequence enabled us to identify 11 full-length *MLO* genes in *C. avellana*, a gene family that is ubiquitous in higher plants and controls susceptibility to powdery mildew infection in diverse crop species (Acevedo-Garcia et al. 2014). In plant genomes studied to date, the *MLO* gene family varies in size from 8 (wheat) to 39 (soybean) members, and the family is divided into 6-8 clades, depending on the species included in the analysis.

All *MLO* genes known to play a role in mildew susceptibility fall into Clade IV (monocots) or V (dicots). In *A. thaliana*, a loss of function mutant of *AtMLO2* confers partial resistance to mildew infection, while the triple *AtMLO2/AtMLO6/AtMLO12* mutant is completely resistant. Similarly, knockdown of *MdMLO19* in apple reduced powdery mildew infection by 75% (Pessina et al. 2016). Therefore, although sequence similarity does not guarantee conservation of function, it is likely that one or more of the hazelnut Clade V *MLO* genes could be involved in susceptibility to *E. corylacearum*. In our phylogenetic comparison (Fig. 4A), Clade VII was not clearly separated from Clade V, and Clade IV was basal to both, suggesting that these 3 may form a sub-family of *MLO* genes involved in PM susceptibility. In apple, *MdMLO19* is upregulated during PM infection, and so is *MdMLO18*, which falls into Clade VII (Pessina et al. 2014). Therefore, Cav02g29751, along with Cav07g20270, Cav07g20290, Cav07g20321 & Cav10g10331, should be prioritized for further functional studies. In particular, it would be extremely valuable to identify natural *MLO* mutations leading to PM resistance in hazelnut germplasm, as has been documented in crops such as cucumber and apple (Berg et al. 2015; Pessina et al. 2017).

The molecular function of *MLO* proteins is still unclear, but in their absence mildew infection is blocked at the point of cell wall penetration (Kusch and Panstruga 2017), suggesting that mildew fungi may need to use them as a receptor to initiate cell entry. Their ubiquitous presence in plant genomes and the fact that all naturally occurring *MLO* mutants are recessive indicates that they perform a necessary function for the plant in the absence of PM. This is consistent with our observations of the genomic context of hazelnut *MLO* genes

581 (Fig. 4B), where the Clade V/VII genes in particular seem have been selected for  
582 diversification; we hypothesize that historic PM disease pressure could have led to  
583 suppression or disruption of some *MLO* genes, while their value in the absence of disease  
584 has selected for duplication and maintenance of new gene copies. With this in mind, further  
585 study of the interaction of powdery mildew disease and the *MLO* genes in *C. avellana* would  
586 provide valuable insight into the function of this gene family in tree species.

587

### 588 **A catalogue of allergens suggests strategies for addressing hazelnut sensitization**

589 In the Western world, food allergy is a widely-recognized health problem and nut allergy is  
590 one of the best studied examples, with 1-2% of the population having some kind of  
591 sensitization to hazelnut (Costa et al. 2015). A diverse group of allergenic proteins have  
592 been identified by their ability to provoke an IgE-mediated immune response in sensitized  
593 individuals (Table 4, Figure 5). We were able to identify a complete catalogue of genes for  
594 these proteins within the *C. avellana* genome; this showed that the previously reported  
595 allergen isoforms result both from multiple genes within the genome, and multiple alleles of  
596 those genes in different individuals. Based on this catalogue, we also identified likely cross-  
597 reactive allergens that have not been reported previously, which will help to guide ongoing  
598 studies aiming to treat or prevent hazelnut allergy.

599 The allergic response is complex and varies between individuals. For example, the allergens  
600 Cor a 1, 2, 6 & 10 are most abundant in pollen; it is thought that sensitization to these  
601 proteins primarily occurs at the mucosal membranes of the respiratory system, leading to  
602 localized symptoms. However, sensitization to consumed nuts is more likely to result in  
603 severe, systemic allergic responses; Cor a 8 and the seed storage proteins (Cor a 9, Cor a  
604 11 and Cor a 14) have each been associated with a higher risk of severe allergy, depending  
605 on the study population (Schocker et al. 2004; Garino et al. 2010; Datema et al. 2015).  
606 Moreover, many individuals show sensitization both to pollen and nuts. This complex  
607 response makes it difficult to predict which proteins could be allergenic; however, some  
608 common features can be noted between the known hazelnut allergens (Fig. 5b). Cor a 1,

609 Cor a 8 & TLPs are all members of 'Pathogenesis Response' protein families (PR-10, PR-14  
610 and PR-5 respectively), which were first identified by their increased expression during the  
611 plant hypersensitive response to infection. They have diverse molecular functions but are  
612 relatively small proteins that resist protease degradation and are often stabilized by disulfide  
613 bonds, meaning that they are likely to be presented to the immune system with their 3-  
614 dimensional structure intact. Cor a 1, the major hazelnut pollen allergen, is known to include  
615 multiple isoallergens that cross-react with each other and those from other species (Lüttkopf  
616 et al. 2002). From the *C. avellana* genome sequence we were able to identify several new  
617 Cor a 1 variants, as well as demonstrating that they form a well conserved sub-group distinct  
618 from the other PR-10 family proteins (Fig. 5a, here described as 'Cor a 1-like'). Given the  
619 known cross-reactivity of this class of allergens, it may be that the existence of multiple,  
620 closely related genes in the genome itself increases the risk of allergenicity. If so, the TLP  
621 family shares all of these characteristics with Cor a 1; although not conclusively proven to be  
622 allergens in hazelnut (Palacín et al. 2012), they should be regarded as high-risk.  
623 The existence of so many variants in the genome suggests that removing these allergens  
624 through breeding or genome editing would be impractical. However, Cor a 8 is a more  
625 promising target; although the nsLTPs are also a multigene family, Cor a 8 is highly diverged  
626 from the other members, so cross-reactivity is unlikely. Even so, more functional studies are  
627 needed to determine whether it is essential to the health of the tree.  
628 The remaining nut allergens are both resistant to the heat used in cooking and the acidity  
629 and protease activity of the gastrointestinal tract. The seed storage proteins are highly  
630 abundant, making up >50% of all protein in nuts (Beyer et al. 2002). They are also found in  
631 condensed 'protein bodies' within the plant cell, increasing the probability that at least some  
632 of these proteins will be presented to the immune system with their conformational epitopes  
633 intact. Similarly, the oleosins are tightly associated with intracellular oil droplets, which may  
634 help to protect them from degradation (Akkerdaas et al. 2006). They were only recognized  
635 as allergens relatively recently, because methods used to produce protein extracts from nuts

636 often eliminate oil droplets; however, Cor a 12-sensitivity was observed consistently in 10-  
637 25% of hazelnut allergic patients across Europe (Datema et al. 2015).

638 This illustrates that, while empirical testing of allergic response is essential to characterize  
639 allergens, there is always a risk of overlooking some important factors. In contrast the  
640 genomic survey presented here can give confidence that all relevant proteins have been  
641 identified and provide a foundation for further studies of allergenicity.

642

## 643 **Conclusions**

644 We present here a chromosome-level reference genome assembly and annotation for  
645 European hazelnut, *C. avellana* cv. Tombul. Using a combination of short-read, long-read  
646 and proximity ligation sequencing we produced a genome of similar quality to those obtained  
647 by anchoring contigs to high-density genetic maps, making this to our knowledge the most  
648 complete tree nut genome published to date. The genes and functional elements identified  
649 here provide a foundation for ensuring the sustainability of future hazelnut production, for  
650 example by identifying targets for breeding or gene knockout that could confer resistance to  
651 powdery mildew disease and decrease the risk of hazelnut allergy.

652

## 653 **Methods**

### 654 **Plant materials and DNA purification**

655 2-year old saplings of *C. avellana* L. var. Tombul were obtained from commercial nurseries in  
656 Turkey and cultivated on the Sabanci University campus. Isolation of high-quality gDNA  
657 proved to be difficult, due to the abundance of polysaccharides and other compounds in  
658 hazel tissues that are not easily separated from DNA by standard techniques. Therefore, we  
659 adopted an isolation method previously developed for *Betula nana* (Wang et al. 2013), with  
660 some modifications: best results were obtained by isolating DNA from leaf buds, the  
661 incubation time with 2x CTAB buffer was shortened to 1 hr at 65°C, and RNase A was  
662 applied in this step rather than as a separate incubation. Purified DNA was additionally

663 bound to a silica membrane (NucleoSpin Plant II Kit, Macherey-Nagel, Düren, Germany) and  
664 washed to remove low molecular weight DNA fragments, before being eluted in 60 µl of TE  
665 buffer. Final DNA concentration was measured using a dsDNA-specific fluorescent dye  
666 (Quant-iT HS dsDNA Assay Kit, ThermoFisher, Waltham, MA, USA).

667

### 668 **Next-Generation Sequencing & *de novo* genome sequence assembly**

669 Illumina library preparation and sequencing were carried out by Macrogen (Seoul, S Korea).  
670 2 Paired-end shotgun sequencing libraries were produced using TruSeq Library Preparation  
671 kits, size selected to have an average insert of 700-800 bp, and sequenced on a single lane  
672 of a HiSeq 4000 instrument (Illumina, San Diego, CA, USA). Single-molecule sequencing  
673 was carried out in-house; whole genomic DNA was physically disrupted into ~8kb fragments  
674 using a Covaris g-TUBE (Covaris, Woburn, MA, USA) and then prepared for NanoPore  
675 sequencing on the MinION platform using the Ligation Sequencing Kit 1D, according to the  
676 manufacturer's protocols (Oxford NanoPore Technologies, Oxford, UK). Data was obtained  
677 from a 48 hr run on a single R9.4 flowcell. Proximity ligation sequencing was carried out by  
678 Dovetail Genomics (Santa Cruz, CA) using their proprietary Chicago & HiC protocols.

679 The quality of high-throughput sequencing data was assessed using FastQC  
680 (Andrews and Babraham Bioinformatics 2010). *De novo* sequence assembly was carried out  
681 on the High Performance Computing cluster (HPC) at Sabanci University. For Illumina-only  
682 assembly, raw sequence reads were processed with Trimmomatic (Bolger et al. 2014) to  
683 remove TruSeq adapters, trim bases with quality score <5 from both ends of the reads, and  
684 use a sliding window of 4 bases to cut the reads when average sequence quality across the  
685 window dropped below 20. The trimmed sequences were then assembled using ABySS 1.9  
686 (Simpson et al. 2009) with a range of k-mer size values; k=80 was found to empirically to  
687 give the most contiguous assembly, which was improved further by enabling scaffolding  
688 across large bubbles in the k-mer graph (POPBUBBLES\_OPTIONS=--scaffold b=5000).  
689 MinION sequencing adapters were trimmed from the first and last 50 nt of NanoPore reads  
690 using bbduk from the BBtools suite (Bushnell 2016) with the options k=19, editdistance=3.

691 Hybrid genome assembly of the Illumina and trimmed NanoPore reads was carried out using  
692 MaSuRCA 3.2 (Zimin et al. 2013), with the average Illumina insert size specified as 790±80  
693 nt. This assembly took approximately 9 days running on 36 CPUs in parallel.  
694 Proximity ligation data was integrated with both the Illumina-only and the Hybrid genome  
695 assembly using Dovetail Genomics' HiRise assembly pipeline.

696

### 697 **Assessment of assembly completeness and genome sequence comparisons**

698 The completeness and accuracy of genome assemblies was assessed using BUSCO v3  
699 (Waterhouse et al. 2018) using default settings for the provided virtual machine, with the  
700 reference database for single copy genes found in land plants (embryophyta) from OrthoDB  
701 v9.1 (Kriventseva et al. 2015). The draft *C. avellana* cv. 'Jefferson' genome, CDS and  
702 annotations were retrieved from the original producers' web portal  
703 (<http://hazelnut.data.mocklerlab.org/>). Tree genome assemblies used for inter-species  
704 comparison were as follows (with GenBank Assembly ID): *Betula nana* (GCA\_000327005.1),  
705 *Betula pendula* (GCA\_900184695.1), *Populus trichocarpa* (GCA\_000002775.3), *Prunus*  
706 *persica* (GCA\_000346465.2), *Juglans nigra* (GCA\_003123865.1) and *Juglans regia*  
707 (GCF\_001411555.1).

708 Routine sequence similarity searches for single or moderate numbers of sequence elements  
709 in the genome assemblies were carried out using standalone BLAST+ 2.2.30 (Camacho et  
710 al. 2009). Whole genome searches and comparisons were realised with bwa 0.7.12 (Li and  
711 Durbin 2010) and resulting alignment files were processed and analysed using SAMtools 1.8  
712 (Li et al. 2009) and bcftools 1.8 (Danecek et al. 2011).

713

### 714 **Detection and masking of repetitive elements**

715 Repetitive elements were identified using RepeatMasker 4.0.7 on 'normal' sensitivity with  
716 default scoring matrices and a custom repeat database produced by combining novel  
717 repeats detected in the Tombul genome (Supplementary Information) with all eudicot  
718 repetitive elements recorded in RepBase Update 22.08 (5,913 elements) and mipsREdat 9.3



719 (26,123 elements) (Jurka et al. 2005; Smit et al.; Nussbaumer et al. 2012). Detected repeats  
720 were masked with runs of 'N'. For subsequent identification of protein-coding genes and  
721 other functional elements, the `-noLow` option was used to leave simple repeats and low-  
722 complexity regions unmasked.

723

#### 724 **Prediction of hazelnut functional RNAs and miRNA targets**

725 Discovery of tRNA genes was carried using tRNAscan-SE 2.0.0(Chan and Lowe 2019). To  
726 detect rRNA, masked chromosome sequences were searched using BLASTN (e-value cut-  
727 off 1e-30) with the following coding sequences: previously published 5S rRNA of *C. avellana*  
728 (Genbank HF542974.1(Falisticco and Marconi 2013)); and complete tree 45S rRNA  
729 sequences retrieved from Genbank.

730 Conserved miRNA genes were identified using all reported plant miRNAs from miRBase v22  
731 (Kozomara et al. 2019) with SUMirFind and SUMirFold (Lucas and Budak 2012), using a  
732 mismatch cutoff  $\leq 3$  for initial miRNA homolog detection, followed by predicted pre-miRNA  
733 secondary structure prediction and selection of strong miRNA candidates based on  
734 established structural criteria (Lucas and Budak 2012). For inter-species comparison, the  
735 same methods were used to identify miRNA genes in other plant genomes.

736 Expression of putative miRNAs was confirmed by using all non-redundant pre-miRNA  
737 sequences to search assembled Tombul transcripts using BLASTN, retaining hits with >78%  
738 identity, >80% coverage as expressed pre-miRNAs. Experimentally validated targets of  
739 specific miRNA families found in *C. avellana* were retrieved from miRBase. Predicted targets  
740 of putative miRNAs were found in the transcripts using psRNATarget (Dai et al. 2018).  
741 Predicted targets were annotated with Gene Ontology terms using Blast2GO software  
742 (Conesa and Götze 2008).

743

#### 744 **Protein-coding Gene Modelling and Annotation**

745 Prediction of gene models was carried out by Augustus, an *ab initio* gene predictor based on  
746 Hidden Markov Models (Stanke and Waack 2003). Augustus was run on the masked Tombul

747 genome using parameters optimised for *Arabidopsis thaliana*. High-confidence genes were  
748 then identified by aligning gene models to the Tombul transcriptome using BLASTN, and  
749 retaining hits with  $\geq 90\%$  sequence identity and  $\geq 25\%$  query coverage. Additional gene  
750 modelling in genome regions with significant homology to orthologs from other plants ( $>50\%$   
751 identity over  $>35$  amino acids) was carried out using FGENESH (Solovyev et al. 2006) with  
752 training parameters from *Betula nana*. Functional annotation of the gene models was carried  
753 out using Mercator, Mercator4, and TRAPID with default parameters, and additional GO term  
754 plots were produced using REVIGO (Schwacke et al. 2019; Van Bel et al. 2013; Supek et al.  
755 2011).

756

### 757 **Characterization of MLO and allergen gene families**

758 All gene models annotated with the InterPro domains IPR004326, 'Mlo-related protein,'  
759 IPR000916, 'Bet v I allergen', and other allergen-related domains were inspected individually.  
760 *A. thaliana* MLO protein sequences were obtained from the Araport11 genome annotation  
761 (Cheng et al. 2017), while those for *Malus domestica* came from the Genome Database for  
762 Rosaceae (Jung et al. 2019). Reference allergen sequences were retrieved from Genbank,  
763 using the accessions listed at [www.allergen.org](http://www.allergen.org). MLO and allergen gene models were  
764 verified and re-annotated as described in Supplementary Information. Transmembrane  
765 structure of predicted MLO protein sequences was evaluated using TMHMM 2.0 with default  
766 parameters (Krogh et al. 2001). Incomplete gene fragments and unexpressed homologs  
767 were detected by searching the pseudochromosomes using tblastn, with the complete  
768 protein sequences as the query. MEGA 6.0 (Tamura et al. 2013) was used for multiple  
769 sequence alignments (using the Muscle algorithm) and for phylogenetic clustering.

770

### 771 **Data Access**

772 All raw and processed sequencing data generated in this study have been submitted to the  
773 European Nucleotide Archive (ENA), under accession number PRJEB31933  
774 (<https://www.ebi.ac.uk/ena/data/view/PRJEB31933>).

775 **Acknowledgments:** This work was supported financially by the Scientific and  
776 Technological Research Council of Turkey (TÜBİTAK grant no. 215O446 to SJL) and by the  
777 Newton Fund Institutional Links programme (Grant no. 216394498 to RJAB). This study  
778 utilized the Sabanci HPC Cluster for computing support. The authors would like to  
779 thank Nihal Öztolan Erol and Andrew J. Helmstetter for helpful discussions.

#### 780 **Author Contributions:**

781 SJL conceived the study, developed analysis pipelines, analyzed and interpreted data and  
782 wrote the manuscript. KK & BA acquired, analyzed and interpreted data, prepared figures,  
783 and drafted sections the manuscript. RJAB contributed substantively to study design and  
784 revised the manuscript. IB analyzed and interpreted additional data. All authors read and  
785 approved the final manuscript.

786

787 **Disclosure Declaration:** The authors declare that they have no competing interests.

788

#### 789 **References**

790 Acevedo-Garcia J, Kusch S, Panstruga R. 2014. Magical mystery tour : MLO proteins in plant  
791 immunity and beyond. *New Phytol* **204**: 273–281.

792 <http://doi.wiley.com/10.1111/nph.12889> (Accessed September 4, 2019).

793 Akkerdaas JH, Schocker F, Vieths S, Versteeg S, Zuidmeer L, Hefle SL, Aalberse RC,  
794 Richter K, Ferreira F, Van Ree R. 2006. Cloning of oleosin, a putative new hazelnut  
795 allergen, using a hazelnut cDNA library. *Mol Nutr Food Res* **50**: 18–23.

796 Andrews S, Babraham Bioinformatics. 2010. FastQC: A quality control tool for high  
797 throughput sequence data. *Manual*.

798 Aquilano K, Ceci V, Gismondi A, Stefano S De, Iacovelli F, Faraonio R, Marco G Di, Poerio  
799 N, Minutolo A, Minopoli G, et al. 2019. Adipocyte metabolism is improved by TNF  
800 receptor-targeting small RNAs identified from dried. *Commun Biol* **2**: 317.

801 Avsar B, Aliabadi DE. 2017. Identification of microRNA elements from genomic data of

- 802 European hazelnut (*Corylus avellana* L.) and its close relatives. *Plant Omi J* **10**: 190–  
803 196.
- 804 Berg JA, Appiano M, Santillán Martínez M, Hermans FWK, Vriezen WH, Visser RGF, Bai Y,  
805 Schouten HJ. 2015. A transposable element insertion in the susceptibility gene  
806 CsaMLO8 results in hypocotyl resistance to powdery mildew in cucumber. *BMC Plant*  
807 *Biol* **15**: 243.
- 808 Beyer K, Grishina G, Bardina L, Grishin A, Sampson HA. 2002. Identification of an 11S  
809 globulin as a major hazelnut food allergen in hazelnut-induced systemic reactions. *J*  
810 *Allergy Clin Immunol* **110**: 517–523.
- 811 Bhattarai G, Mehlenbacher SA. 2017. In silico development & characterization of tri-  
812 nucleotide simple sequence repeat markers in hazelnut (*Corylus avellana* L.). *PLoS*  
813 *One*.
- 814 Bolger AM, Lohse M, Usadel B. 2014. Trimmomatic: A flexible trimmer for Illumina sequence  
815 data. *Bioinformatics*.
- 816 Bologna NG, Voinnet O. 2014. The Diversity, Biogenesis, and Activities of Endogenous  
817 Silencing Small RNAs in *Arabidopsis*. *Annu Rev Plant Biol* **65**: 473–503.  
818 <http://www.ncbi.nlm.nih.gov/pubmed/24579988> (Accessed September 4, 2019).
- 819 Breiteneder H, Ferreira F, Hoffmann-Sommergruber K, Ebner C, Breitenbach M, Rumpold H,  
820 Kraft D, Scheiner O. 1993. Four recombinant isoforms of Cor a I, the major allergen of  
821 hazel pollen, show different IgE-binding properties. *Eur J Biochem* **212**: 355–362.
- 822 Büschges R, Hollricher K, Panstruga R, Simons G, Wolter M, Frijters A, van Daelen R, van  
823 der Lee T, Diergaarde P, Groenendijk J, et al. 1997. The barley Mlo gene: a novel  
824 control element of plant pathogen resistance. *Cell* **88**: 695–705.  
825 <http://www.ncbi.nlm.nih.gov/pubmed/9054509> (Accessed September 4, 2019).
- 826 Bushnell B. 2016. BBtools. *Jt Genome Inst*.
- 827 Camacho C, Coulouris G, Avagyan V, Ma N, Papadopoulos J, Bealer K, Madden TL. 2009.  
828 BLAST+: architecture and applications. *BMC Bioinformatics* **10**: 421.
- 829 Chan PP, Lowe TM. 2019. tRNAscan-SE: Searching for tRNA Genes in Genomic

- 830 Sequences. In *Methods in molecular biology (Clifton, N.J.)*, Vol. 1962 of, pp. 1–14  
831 <http://www.ncbi.nlm.nih.gov/pubmed/31020551> (Accessed September 5, 2019).
- 832 Chapman MD, Pomés A, Breiteneder H, Ferreira F. 2007. Nomenclature and structural  
833 biology of allergens. *J Allergy Clin Immunol* **119**: 414–420.
- 834 Chen X, Zhang J, Liu Q, Guo W, Zhao T, Ma Q, Wang G. 2014. Transcriptome sequencing  
835 and identification of cold tolerance genes in hardy *Corylus* species (*C. heterophylla*  
836 *fisch*) floral buds. *PLoS One*.
- 837 Cheng CY, Krishnakumar V, Chan AP, Thibaud-Nissen F, Schobel S, Town CD. 2017.  
838 Araport11: a complete reannotation of the *Arabidopsis thaliana* reference genome. *Plant*  
839 *J* **89**: 789–804.
- 840 Colburn BC, Mehlenbacher SA, Sathuvalli VR. 2017. Development and mapping of  
841 microsatellite markers from transcriptome sequences of European hazelnut (*Corylus*  
842 *avellana* L.) and use for germplasm characterization. *Mol Breed* **37**.
- 843 Conesa A, Götz S. 2008. Blast2GO: A comprehensive suite for functional analysis in plant  
844 genomics. *Int J Plant Genomics* **2008**.
- 845 Costa J, Mafra I, Carrapatoso I, Oliveira MBPP. 2015. Hazelnut allergens: Molecular  
846 characterization, detection, and clinical relevance. *Crit Rev Food Sci Nutr* **56**: 2579–  
847 2605.
- 848 Dai X, Zhuang Z, Zhao PX. 2018. psRNATarget: a plant small RNA target analysis server  
849 (2017 release). *Nucleic Acids Res* **46**: W49–W54.  
850 <https://academic.oup.com/nar/article/46/W1/W49/4990032> (Accessed September 4,  
851 2019).
- 852 Danecek P, Auton A, Abecasis G, Albers CA, Banks E, DePristo MA, Handsaker RE, Lunter  
853 G, Marth GT, Sherry ST, et al. 2011. The variant call format and VCFtools.  
854 *Bioinformatics*.
- 855 Datema MR, Zuidmeer-Jongejan L, Asero R, Barreales L, Belohlavkova S, De Blay F, Bures  
856 P, Clausen M, Dubakiene R, Gislason D, et al. 2015. Hazelnut allergy across Europe  
857 dissected molecularly: A EuroPrevall outpatient clinic survey. *J Allergy Clin Immunol*

- 858           **136**: 382–391.
- 859   Falistocco E, Marconi G. 2013. Cytogenetic characterization by in situ hybridization  
860           techniques and molecular analysis of 5S rRNA genes of the European hazelnut  
861           (*Corylus avellana*). *Genome* **56**: 155–159.
- 862   FAO. 2017. FAOSTAT. <http://www.fao.org/faostat/en/#data/QC> (Accessed August 11, 2017).
- 863   Fischer S, Brunk BP, Chen F, Gao X, Harb OS, Iodice JB, Shanmugam D, Roos DS,  
864           Stoeckert CJ, Jr. 2011. Using OrthoMCL to assign proteins to OrthoMCL-DB groups or  
865           to cluster proteomes into new ortholog groups. *Curr Protoc Bioinforma* **Chapter 6**: Unit  
866           6.12.1-19. <http://www.ncbi.nlm.nih.gov/pubmed/21901743> (Accessed September 4,  
867           2019).
- 868   Garino C, Zuidmeer L, Marsh J, Lovegrove A, Morati M, Versteeg S, Schilte P, Shewry P,  
869           Arlorio M, van Ree R. 2010. Isolation, cloning, and characterization of the 2S albumin: A  
870           new allergen from hazelnut. *Mol Nutr Food Res* **54**: 1257–1265.
- 871   Gürcan K, Mehlenbacher SA. 2010. Development of microsatellite marker loci for European  
872           hazelnut (*Corylus avellana* L.) from ISSR fragments. *Mol Breed*.
- 873   Gürcan K, Mehlenbacher SA, Botta R, Boccacci P. 2010. Development, characterization,  
874           segregation, and mapping of microsatellite markers for European hazelnut (*Corylus*  
875           *avellana* L.) from enriched genomic libraries and usefulness in genetic diversity studies.  
876           *Tree Genet Genomes*.
- 877   Hoffmann-Sommergruber K, Vanek-Krebitz M, Radauer C, Wen J, Ferreira F, Scheiner O,  
878           Breiteneder H. 1997. Genomic characterization of members of the Bet v 1 family: Genes  
879           coding for allergens and pathogenesis-related proteins share intron positions. *Gene*  
880           **197**: 91–100.
- 881   Jimenez-Lopez JC, Morales S, Castro AJ, Volkmann D, Rodríguez-García MI, de Alché JD.  
882           2012. Characterization of profilin polymorphism in pollen with a focus on  
883           multifunctionality. *PLoS One* **7**.
- 884   Jung S, Lee T, Cheng CH, Buble K, Zheng P, Yu J, Humann J, Ficklin SP, Gasic K, Scott K,  
885           et al. 2019. 15 years of GDR: New data and functionality in the Genome Database for

- 886 Rosaceae. *Nucleic Acids Res* **47**: D1137–D1145.
- 887 Jurka J, Kapitonov V V., Pavlicek A, Klonowski P, Kohany O, Walichiewicz J. 2005. Repbase  
888 Update, a database of eukaryotic repetitive elements. *Cytogenet Genome Res* **110**:  
889 462–467.
- 890 Kozomara A, Birgaoanu M, Griffiths-Jones S. 2019. miRBase: from microRNA sequences to  
891 function. *Nucleic Acids Res* **47**: D155–D162.  
892 <http://www.ncbi.nlm.nih.gov/pubmed/30423142> (Accessed September 5, 2019).
- 893 Kriventseva E V., Tegenfeldt F, Petty TJ, Waterhouse RM, Simão FA, Pozdnyakov IA,  
894 Ioannidis P, Zdobnov EM. 2015. OrthoDB v8: update of the hierarchical catalog of  
895 orthologs and the underlying free software. *Nucleic Acids Res* **43**: D250–D256.  
896 [http://academic.oup.com/nar/article/43/D1/D250/2439459/OrthoDB-v8-update-of-the-](http://academic.oup.com/nar/article/43/D1/D250/2439459/OrthoDB-v8-update-of-the-hierarchical-catalog-of)  
897 [hierarchical-catalog-of](http://academic.oup.com/nar/article/43/D1/D250/2439459/OrthoDB-v8-update-of-the-hierarchical-catalog-of) (Accessed September 5, 2019).
- 898 Krogh A, Larsson B, Von Heijne G, Sonnhammer ELL. 2001. Predicting transmembrane  
899 protein topology with a hidden Markov model: Application to complete genomes. *J Mol*  
900 *Biol* **305**: 567–580.
- 901 Kusch S, Panstruga R. 2017. Mlo-based resistance: An apparently universal “weapon” to  
902 defeat powdery mildew disease. *Mol Plant-Microbe Interact* **30**: 179–189.
- 903 La Camera S, Balagué C, Göbel C, Geoffroy P, Legrand M, Feussner I, Roby D, Heitz T.  
904 2009. The Arabidopsis patatin-like protein 2 (PLP2) plays an essential role in cell death  
905 execution and differentially affects biosynthesis of oxylipins and resistance to  
906 pathogens. *Mol Plant-Microbe Interact* **22**: 469–481.
- 907 Li H, Durbin R. 2010. Fast and accurate long-read alignment with Burrows-Wheeler  
908 transform. *Bioinformatics* **26**: 589–595.
- 909 Li H, Handsaker B, Wysoker A, Fennell T, Ruan J, Homer N, Marth G, Abecasis G, Durbin R.  
910 2009. The Sequence Alignment/Map format and SAMtools. *Bioinformatics* **25**: 2078–  
911 2079.
- 912 Lucas SJ, Budak H. 2012. Sorting the wheat from the Chaff: Identifying miRNAs in genomic  
913 survey sequences of *Triticum aestivum* chromosome 1AL. *PLoS One* **7**.

- 914 Lüttkopf D, Müller U, Skov PS, Ballmer-Weber BK, Wüthrich B, Skamstrup Hansen K,  
915 Poulsen LK, Kästner M, Haustein D, Vieths S. 2002. Comparison of four variants of a  
916 major allergen in hazelnut (*Corylus avellana*) Cor a 1.04 with the major hazel pollen  
917 allergen Cor a 1.01. *Mol Immunol* **38**: 515–525.
- 918 Ma H, Lu Z, Liu B, Qiu Q, Liu J. 2013. Transcriptome analyses of a Chinese hazelnut species  
919 *Corylus mandshurica*. *BMC Plant Biol.*
- 920 Marinoni DT, Beltramo C, Akkak A, Destefanis ML, Boccacci P, Botta R. 2009. Gene  
921 expression and sporophytic self-incompatibility in hazelnut. *Acta Hort.*
- 922 Marinoni DT, Valentini N, Portis E, Acquadro A, Beltramo C, Mehlenbacher SA, Mockler TC,  
923 Rowley ER, Botta R. 2018. High density SNP mapping and QTL analysis for time of leaf  
924 budburst in *Corylus avellana* L. *PLoS One*.
- 925 Martínez-García PJ, Crepeau MW, Puiu D, Gonzalez-Ibeas D, Whalen J, Stevens KA, Paul  
926 R, Butterfield TS, Britton MT, Reagan RL, et al. 2016. The walnut (*Juglans regia*)  
927 genome sequence reveals diversity in genes coding for the biosynthesis of non-  
928 structural polyphenols. *Plant J* **87**: 507–532.
- 929 Mehlenbacher SA, Brown RN, Nouhra ER, Gökirmak T, Bassil N V, Kubisiak TL. 2006. A  
930 genetic linkage map for hazelnut (*Corylus avellana* L.) based on RAPD and SSR  
931 markers. *Genome*.
- 932 Molnar TJ, Capik J. 2012. Advances in hazelnut research in North America. *Acta Hort* **940**:  
933 57–65.
- 934 Nussbaumer T, Martis MM, Roessner SK, Pfeifer M, Bader KC, Sharma S, Gundlach H,  
935 Spannagl M. 2012. MIPS PlantsDB: a database framework for comparative plant  
936 genome research. *Nucleic Acids Res* **41**: D1144–D1151.  
937 <http://www.ncbi.nlm.nih.gov/pubmed/23203886> (Accessed September 4, 2019).
- 938 Öztürk SC, Göktay M, Allmer J, Doğanlar S, Frary A. 2018. Development of Simple  
939 Sequence Repeat Markers in Hazelnut (*Corylus avellana* L . ) by Next-Generation  
940 Sequencing and Discrimination of Turkish Hazelnut Cultivars. *Plant Mol Biol Report*.  
941 <https://link.springer.com/article/10.1007/s11105-018-1120->



942 0?utm\_source=researcher\_app&utm\_medium=referral&utm\_campaign=MKEF\_USG\_R  
943 esearcher\_inbound.

944 Palacín A, Rivas LA, Gómez-Casado C, Aguirre J, Tordesillas L, Bartra J, Blanco C, Carrillo  
945 T, Cuesta-Herranz J, Bonny JAC, et al. 2012. The Involvement of Thaumatin-Like  
946 Proteins in Plant Food Cross-Reactivity: A Multicenter Study Using a Specific Protein  
947 Microarray. *PLoS One* **7**.

948 Pessina S, Angeli D, Martens S, Visser RGF, Bai Y, Salamini F, Velasco R, Schouten HJ,  
949 Malnoy M. 2016. The knock-down of the expression of MdMLO19 reduces susceptibility  
950 to powdery mildew (*Podosphaera leucotricha*) in apple (*Malus domestica*). *Plant*  
951 *Biotechnol J* **14**: 2033–2044.

952 Pessina S, Palmieri L, Bianco L, Gassmann J, van de Weg E, Visser RGF, Magnago P,  
953 Schouten HJ, Bai Y, Riccardo Velasco R, et al. 2017. Frequency of a natural truncated  
954 allele of MdMLO19 in the germplasm of *Malus domestica*. *Mol Breed* **37**: 7.

955 Pessina S, Pavan S, Catalano D, Gallotta A, Visser RGF, Bai Y, Malnoy M, Schouten HJ.  
956 2014. Characterization of the MLO gene family in Rosaceae and gene expression  
957 analysis in *Malus domestica*. *BMC Genomics* **15**: 618.

958 Rowley ER, Fox SE, Bryant DW, Sullivan CM, Priest HD, Givan SA, Mehlenbacher SA,  
959 Mockler TC. 2012. Assembly and characterization of the European hazelnut “Jefferson”  
960 transcriptome. *Crop Sci*.

961 Rowley ER, Vanburen R, Bryant DW, Priest HD, Shawn A, Mockler TC. 2018. RESEARCH  
962 ARTICLE A Draft Genome and High-Density Genetic Map of European Hazelnut (*Corylus*  
963 *avellana* L.). *bioArxiv* 1–25.

964 Salojärvi J, Smolander OP, Nieminen K, Rajaraman S, Safronov O, Safdari P, Lamminmäki  
965 A, Immanen J, Lan T, Tanskanen J, et al. 2017. Genome sequencing and population  
966 genomic analyses provide insights into the adaptive landscape of silver birch. *Nat Genet*  
967 **49**: 904–912.

968 Sathuvalli V, Mehlenbacher SA, Smith DC. 2017. High-Resolution Genetic and Physical  
969 Mapping of the Eastern Filbert Blight Resistance Region in ‘Jefferson’ Hazelnut (*C. L.*).

- 970 *Plant Genome* **10**: 0.  
971 <https://dl.sciencesocieties.org/publications/tpg/abstracts/10/2/plantgenome2016.12.0123>  
972 .
- 973 Schocker F, Lüttkopf D, Scheurer S, Petersen A, Cisteró-Bahima A, Enrique E, San Miguel-  
974 Moncín M, Akkerdaas J, Van Ree R, Vieths S, et al. 2004. Recombinant lipid transfer  
975 protein Cor a 8 from hazelnut: A new tool for in vitro diagnosis of potentially severe  
976 hazelnut allergy. *J Allergy Clin Immunol* **113**: 141–147.
- 977 Schwacke R, Ponce-Soto GY, Krause K, Bolger AM, Arsova B, Hallab A, Gruden K, Stitt M,  
978 Bolger ME, Usadel B. 2019. MapMan4: A Refined Protein Classification and Annotation  
979 Framework Applicable to Multi-Omics Data Analysis. *Mol Plant* **12**: 879–892.  
980 <https://linkinghub.elsevier.com/retrieve/pii/S1674205219300085> (Accessed September  
981 4, 2019).
- 982 Sezer A, Dolar FS, Lucas SJ, Köse Ç, Gümüş E. 2017. First report of the recently  
983 introduced, destructive powdery mildew *Erysiphe corylacearum* on hazelnut in Turkey.  
984 *Phytoparasitica* **45**: 577–581.
- 985 Simpson JT, Wong K, Jackman SD, Schein JE, Jones SJM, Birol I. 2009. ABySS: A parallel  
986 assembler for short read sequence data. *Genome Res*.
- 987 Smit AF., Hubley R, Green P. RepeatMasker. [http://www.repeatmasker.org/cgi-](http://www.repeatmasker.org/cgi-bin/WEBRepeatMasker)  
988 [bin/WEBRepeatMasker](http://www.repeatmasker.org/cgi-bin/WEBRepeatMasker) (Accessed September 4, 2019).
- 989 Snelling JW, Sathuvalli VR, Colburn BC, Bhattarai G, Rowley ER, Mockler TC, Saski CA,  
990 Copetti D, Mehlenbacher SA. 2018. Genomic resource development in hazelnut  
991 breeding. *Acta Hort* 39–46. [https://www.actahort.org/books/1226/1226\\_5.htm](https://www.actahort.org/books/1226/1226_5.htm)  
992 (Accessed September 4, 2019).
- 993 Solovyev V, Kosarev P, Seledsov I, Vorobyev D. 2006. Automatic annotation of eukaryotic  
994 genes, pseudogenes and promoters. *Genome Biol* **7**.
- 995 Stanke M, Waack S. 2003. Gene prediction with a hidden Markov model and a new intron  
996 submodel. *Bioinformatics* **19**: ii215–ii225.  
997 <http://www.ncbi.nlm.nih.gov/pubmed/14534192> (Accessed September 4, 2019).

- 998 Supek F, Bošnjak M, Škunca N, Šmuc T. 2011. REVIGO Summarizes and Visualizes Long  
999 Lists of Gene Ontology Terms ed. C. Gibas. *PLoS One* **6**: e21800.  
1000 <https://dx.plos.org/10.1371/journal.pone.0021800> (Accessed September 4, 2019).
- 1001 Tamura K, Stecher G, Peterson D, Filipski A, Kumar S. 2013. MEGA6: Molecular  
1002 Evolutionary Genetics Analysis Version 6.0. *Mol Biol Evol* **30**: 2725–2729.  
1003 <http://www.ncbi.nlm.nih.gov/pubmed/24132122> (Accessed September 4, 2019).
- 1004 Thimmappa R, Geisler K, Louveau T, O’Maille P, Osbourn A. 2014. Triterpene Biosynthesis  
1005 in Plants. *Annu Rev Plant Biol* **65**: 225–257.  
1006 <http://www.annualreviews.org/doi/10.1146/annurev-arplant-050312-120229> (Accessed  
1007 September 4, 2019).
- 1008 Ustaoğlu B. 2012. THE EFFECT OF CLIMATIC CONDITIONS ON HAZELNUT (CORYLUS  
1009 AVELLANA) YIELD IN GİRESUN (TURKEY). *Marmara Geogr Rev* **26**: 302–323.
- 1010 Van Bel M, Proost S, Van Neste C, Deforce D, Van de Peer Y, Vandepoele K. 2013.  
1011 TRAPID: an efficient online tool for the functional and comparative analysis of de novo  
1012 RNA-Seq transcriptomes. *Genome Biol* **14**: R134.  
1013 <http://www.ncbi.nlm.nih.gov/pubmed/24330842> (Accessed September 4, 2019).
- 1014 Wang N, Thomson M, Bodles WJA, Crawford RMM, Hunt H V., Featherstone AW, Pellicer J,  
1015 Buggs RJA. 2013. Genome sequence of dwarf birch (*Betula nana*) and cross-species  
1016 RAD markers. *Mol Ecol* **22**: 3098–3111.
- 1017 Wang Y, Cheng X, Shan Q, Zhang Y, Liu J, Gao C, Qiu J-L. 2014. Simultaneous editing of  
1018 three homoeoalleles in hexaploid bread wheat confers heritable resistance to powdery  
1019 mildew. *Nat Biotechnol* **32**: 947–951. <http://www.ncbi.nlm.nih.gov/pubmed/25038773>  
1020 (Accessed September 4, 2019).
- 1021 Waterhouse RM, Seppey M, Simao FA, Manni M, Ioannidis P, Klioutchnikov G, Kriventseva  
1022 E V., Zdobnov EM. 2018. BUSCO applications from quality assessments to gene  
1023 prediction and phylogenomics. *Mol Biol Evol* **35**: 543–548.
- 1024 Zeng L, Tu XL, Dai H, Han FM, Lu BS, Wang MS, Nanaei HA, Tajabadipour A, Mansouri M,  
1025 Li XL, et al. 2019. Whole genomes and transcriptomes reveal adaptation and

1026 domestication of pistachio. *Genome Biol* **20**: 79.

1027 Zimin A V., Marçais G, Puiu D, Roberts M, Salzberg SL, Yorke JA. 2013. The MaSuRCA

1028 genome assembler. *Bioinformatics*.

1029
